# Supplementary material for: The Anti-sigma Factor RsiV Is a Bacterial Receptor for Lysozyme: Co-crystal Structure Determination and Demonstration That Binding of Lysozyme to RsiV Is Required for σV Activation
Source: PubMed Central journal article supplement (PMC5014341; doi:10.1371/journal.pgen.1006287), 2016-09-07
Supplement: pgen.1006287.s012.pdf [file pgen.1006287.s012.pdf]

Table S1

# blastp

# Iteration: 0

# Query:

# RID: KK8J6DHT015

# Database: nr

# Fields: query id, subject ids, % identity, % positives, alignment length, mismatches, gap opens,

# 898 hits found

|         |              |       |       |     |    |   |
|---------|--------------|-------|-------|-----|----|---|
| unnamed | gi 16079767  | 100   | 100   | 285 | 0  | 0 |
| unnamed | gi 430755840 | 99.65 | 100   | 285 | 1  | 0 |
| unnamed | gi 449095149 | 98.95 | 99.3  | 285 | 3  | 0 |
| unnamed | gi 516292751 | 98.6  | 98.95 | 285 | 4  | 0 |
| unnamed | gi 384176288 | 98.25 | 99.3  | 285 | 5  | 0 |
| unnamed | gi 428280151 | 97.89 | 98.95 | 285 | 6  | 0 |
| unnamed | gi 545117568 | 97.89 | 98.6  | 285 | 6  | 0 |
| unnamed | gi 386759260 | 97.54 | 98.6  | 285 | 7  | 0 |
| unnamed | gi 321312221 | 97.54 | 97.89 | 285 | 7  | 0 |
| unnamed | gi 518088803 | 95.79 | 98.6  | 285 | 12 | 0 |
| unnamed | gi 489330062 | 95.79 | 98.6  | 285 | 12 | 0 |
| unnamed | gi 305675297 | 94.74 | 97.89 | 285 | 15 | 0 |
| unnamed | gi 350266880 | 94.74 | 97.89 | 285 | 15 | 0 |
| unnamed | gi 518544982 | 94.04 | 97.19 | 285 | 17 | 0 |
| unnamed | gi 498020924 | 93.33 | 97.89 | 285 | 19 | 0 |
| unnamed | gi 515503793 | 81.47 | 93.71 | 286 | 52 | 1 |
| unnamed | gi 494883764 | 81.82 | 93.01 | 286 | 51 | 1 |
| unnamed | gi 308172500 | 81.12 | 93.01 | 286 | 53 | 1 |
| unnamed | gi 568176318 | 81.47 | 93.01 | 286 | 52 | 1 |
| unnamed | gi 154685118 | 81.47 | 93.01 | 286 | 52 | 1 |
| unnamed | gi 452854621 | 81.47 | 93.01 | 286 | 52 | 1 |
| unnamed | gi 545133883 | 81.47 | 93.01 | 286 | 52 | 1 |
| unnamed | gi 384264201 | 81.47 | 93.01 | 286 | 52 | 1 |
| unnamed | gi 489247651 | 81.12 | 93.36 | 286 | 53 | 1 |
| unnamed | gi 530568429 | 81.12 | 93.36 | 286 | 53 | 1 |
| unnamed | gi 375361324 | 81.12 | 93.01 | 286 | 53 | 1 |
| unnamed | gi 515988421 | 80.77 | 93.01 | 286 | 54 | 1 |
| unnamed | gi 498486110 | 76.49 | 89.82 | 285 | 67 | 0 |
| unnamed | gi 311067088 | 76.14 | 89.82 | 285 | 68 | 0 |
| unnamed | gi 493688771 | 81.12 | 90.56 | 286 | 53 | 1 |
| unnamed | gi 489271484 | 74.48 | 88.46 | 286 | 72 | 1 |
| unnamed | gi 52079037  | 74.48 | 88.11 | 286 | 72 | 1 |
| unnamed | gi 511061459 | 73.43 | 88.46 | 286 | 75 | 1 |

|         |              |       |       |     |     |   |
|---------|--------------|-------|-------|-----|-----|---|
| unnamed | gi 584583183 | 73.78 | 87.76 | 286 | 74  | 1 |
| unnamed | gi 515136413 | 55.56 | 79.51 | 288 | 124 | 2 |
| unnamed | gi 384045510 | 54.51 | 79.17 | 288 | 127 | 2 |
| unnamed | gi 294500639 | 54.86 | 79.17 | 288 | 126 | 2 |
| unnamed | gi 295705992 | 55.21 | 78.82 | 288 | 125 | 2 |
| unnamed | gi 518573218 | 54.2  | 73.78 | 286 | 129 | 2 |
| unnamed | gi 494762022 | 54.2  | 73.78 | 286 | 129 | 2 |
| unnamed | gi 157694452 | 53.85 | 73.78 | 286 | 130 | 2 |
| unnamed | gi 594025497 | 53.15 | 73.78 | 286 | 132 | 2 |
| unnamed | gi 489307457 | 54.2  | 73.78 | 286 | 129 | 2 |
| unnamed | gi 495622957 | 53.5  | 73.78 | 286 | 131 | 2 |
| unnamed | gi 515937874 | 53.5  | 73.78 | 286 | 131 | 2 |
| unnamed | gi 495634542 | 52.63 | 72.28 | 285 | 134 | 1 |
| unnamed | gi 494213570 | 48.47 | 67.12 | 295 | 141 | 3 |
| unnamed | gi 489425692 | 46.26 | 69.73 | 294 | 148 | 4 |
| unnamed | gi 169828834 | 48.65 | 65.88 | 296 | 140 | 5 |
| unnamed | gi 490350953 | 48.82 | 66.33 | 297 | 139 | 6 |
| unnamed | gi 517584129 | 49.15 | 65.87 | 293 | 140 | 4 |
| unnamed | gi 495457112 | 47.65 | 66.11 | 298 | 142 | 6 |
| unnamed | gi 493232334 | 46.26 | 64.63 | 294 | 148 | 3 |
| unnamed | gi 497780557 | 47.42 | 65.98 | 291 | 145 | 3 |
| unnamed | gi 573584812 | 48.31 | 65.88 | 296 | 141 | 5 |
| unnamed | gi 573531864 | 46.26 | 64.29 | 294 | 148 | 3 |
| unnamed | gi 512483909 | 46.92 | 65.07 | 292 | 146 | 3 |
| unnamed | gi 385778167 | 46.31 | 66.11 | 298 | 146 | 4 |
| unnamed | gi 125973950 | 46.31 | 66.11 | 298 | 146 | 4 |
| unnamed | gi 496351561 | 46.84 | 66.11 | 301 | 144 | 5 |
| unnamed | gi 518918267 | 47.84 | 66.11 | 301 | 141 | 6 |
| unnamed | gi 489422799 | 72.84 | 88.89 | 162 | 44  | 0 |
| unnamed | gi 261404313 | 44.22 | 64.63 | 294 | 154 | 3 |
| unnamed | gi 518071632 | 47.92 | 64.58 | 288 | 141 | 3 |
| unnamed | gi 402574332 | 46.98 | 65.44 | 298 | 145 | 6 |
| unnamed | gi 515820194 | 45.92 | 66.33 | 294 | 143 | 5 |
| unnamed | gi 499131542 | 47.3  | 64.53 | 296 | 144 | 5 |
| unnamed | gi 495684281 | 47.28 | 64.97 | 294 | 144 | 4 |
| unnamed | gi 544840272 | 46.39 | 67.01 | 291 | 148 | 3 |
| unnamed | gi 497281662 | 43.54 | 63.27 | 294 | 156 | 3 |
| unnamed | gi 488642450 | 46.31 | 64.43 | 298 | 146 | 3 |
| unnamed | gi 489503132 | 46.31 | 64.43 | 298 | 146 | 3 |
| unnamed | gi 573540592 | 41.75 | 65.32 | 297 | 160 | 4 |
| unnamed | gi 407475024 | 46.49 | 65.22 | 299 | 145 | 4 |

|         |              |       |       |     |     |   |
|---------|--------------|-------|-------|-----|-----|---|
| unnamed | gi 56622667: | 45.64 | 64.77 | 298 | 148 | 3 |
| unnamed | gi 49745240: | 44.83 | 65.86 | 290 | 152 | 4 |
| unnamed | gi 57358586: | 48.97 | 66.21 | 290 | 138 | 4 |
| unnamed | gi 59782867: | 47.74 | 63.41 | 287 | 137 | 6 |
| unnamed | gi 57354568: | 41.61 | 65.77 | 298 | 159 | 6 |
| unnamed | gi 33279896: | 44.78 | 65.32 | 297 | 148 | 4 |
| unnamed | gi 55507742: | 44.78 | 65.32 | 297 | 148 | 4 |
| unnamed | gi 51511225: | 46.49 | 64.21 | 299 | 142 | 6 |
| unnamed | gi 56587857: | 45.72 | 63.57 | 269 | 137 | 3 |
| unnamed | gi 57356742: | 42.57 | 63.18 | 296 | 158 | 4 |
| unnamed | gi 49505482: | 42.09 | 64.31 | 297 | 159 | 4 |
| unnamed | gi 49568384: | 41.98 | 69.97 | 293 | 159 | 6 |
| unnamed | gi 32679298: | 43.49 | 64.73 | 292 | 153 | 6 |
| unnamed | gi 49473728: | 42.31 | 62.94 | 286 | 163 | 2 |
| unnamed | gi 49481118: | 41.96 | 62.94 | 286 | 164 | 2 |
| unnamed | gi 58539601: | 42.57 | 60.81 | 296 | 158 | 4 |
| unnamed | gi 43179289: | 41.69 | 62.71 | 295 | 161 | 3 |
| unnamed | gi 39320128: | 41.3  | 69.62 | 293 | 161 | 6 |
| unnamed | gi 54784082: | 43.06 | 62.15 | 288 | 158 | 4 |
| unnamed | gi 89896976: | 42.81 | 64.88 | 299 | 156 | 5 |
| unnamed | gi 51701581: | 42.81 | 64.55 | 299 | 156 | 5 |
| unnamed | gi 21966715: | 42.67 | 64    | 300 | 157 | 5 |
| unnamed | gi 51868798: | 42.81 | 64.21 | 299 | 156 | 5 |
| unnamed | gi 55782714: | 44.67 | 62.89 | 291 | 148 | 7 |
| unnamed | gi 31065967: | 45.02 | 65.98 | 291 | 148 | 5 |
| unnamed | gi 39239262: | 41.81 | 63.88 | 299 | 159 | 5 |
| unnamed | gi 57358465: | 45.24 | 63.27 | 294 | 149 | 5 |
| unnamed | gi 25179680: | 42.95 | 60.74 | 298 | 156 | 4 |
| unnamed | gi 54505925: | 43.17 | 62.95 | 278 | 145 | 6 |
| unnamed | gi 51083135: | 40.7  | 63.51 | 285 | 167 | 2 |
| unnamed | gi 48951528: | 45.67 | 60.55 | 289 | 137 | 8 |
| unnamed | gi 54469757: | 41.34 | 62.19 | 283 | 154 | 5 |
| unnamed | gi 54505831: | 42.09 | 62.59 | 278 | 148 | 6 |
| unnamed | gi 49169327: | 49.1  | 68.92 | 222 | 107 | 2 |
| unnamed | gi 49103148: | 40.61 | 61.77 | 293 | 157 | 6 |
| unnamed | gi 12669916: | 44.79 | 59.72 | 288 | 141 | 7 |
| unnamed | gi 51509933: | 44.79 | 59.72 | 288 | 141 | 7 |
| unnamed | gi 54496074: | 44.79 | 59.72 | 288 | 141 | 7 |
| unnamed | gi 28943370: | 39.31 | 61.38 | 290 | 159 | 3 |
| unnamed | gi 26068317: | 44.79 | 59.72 | 288 | 141 | 7 |
| unnamed | gi 54497242: | 44.79 | 59.38 | 288 | 141 | 7 |

|         |              |       |       |     |     |   |
|---------|--------------|-------|-------|-----|-----|---|
| unnamed | gi 54498622: | 43.01 | 58.74 | 286 | 149 | 5 |
| unnamed | gi 544969560 | 44.44 | 59.38 | 288 | 142 | 7 |
| unnamed | gi 54929932: | 44.79 | 59.38 | 288 | 141 | 7 |
| unnamed | gi 48952502: | 44.44 | 59.38 | 288 | 142 | 7 |
| unnamed | gi 54495511: | 44.44 | 59.38 | 288 | 142 | 7 |
| unnamed | gi 545051670 | 44.44 | 59.38 | 288 | 142 | 7 |
| unnamed | gi 34754781: | 39.51 | 60.84 | 286 | 164 | 4 |
| unnamed | gi 583837060 | 39.51 | 60.84 | 286 | 164 | 4 |
| unnamed | gi 495450320 | 39.33 | 57.67 | 300 | 166 | 4 |
| unnamed | gi 49361503: | 39.18 | 60.82 | 291 | 162 | 6 |
| unnamed | gi 489507780 | 40.22 | 60.52 | 271 | 156 | 3 |
| unnamed | gi 489524924 | 40.22 | 60.52 | 271 | 156 | 3 |
| unnamed | gi 48864570: | 40.22 | 60.52 | 271 | 156 | 3 |
| unnamed | gi 496596180 | 38.49 | 60.82 | 291 | 164 | 6 |
| unnamed | gi 57779883: | 41.95 | 61.02 | 236 | 136 | 1 |
| unnamed | gi 517420074 | 36.62 | 58.1  | 284 | 170 | 4 |
| unnamed | gi 498524319 | 35.99 | 55.36 | 289 | 174 | 4 |
| unnamed | gi 498407749 | 35.99 | 55.36 | 289 | 174 | 4 |
| unnamed | gi 49847142: | 35.99 | 55.36 | 289 | 174 | 4 |
| unnamed | gi 428768284 | 35.99 | 55.36 | 289 | 174 | 4 |
| unnamed | gi 38451441: | 35.99 | 55.36 | 289 | 174 | 4 |
| unnamed | gi 48830483: | 35.99 | 55.36 | 289 | 174 | 4 |
| unnamed | gi 397701320 | 35.99 | 55.36 | 289 | 174 | 4 |
| unnamed | gi 488287789 | 35.99 | 55.36 | 289 | 174 | 4 |
| unnamed | gi 48833313: | 35.99 | 55.36 | 289 | 174 | 4 |
| unnamed | gi 51489801: | 35.99 | 55.02 | 289 | 174 | 4 |
| unnamed | gi 49852212: | 35.99 | 55.36 | 289 | 174 | 4 |
| unnamed | gi 49852832: | 35.99 | 55.36 | 289 | 174 | 4 |
| unnamed | gi 48831381: | 35.99 | 55.02 | 289 | 174 | 4 |
| unnamed | gi 29377629  | 35.99 | 55.36 | 289 | 174 | 4 |
| unnamed | gi 514886594 | 35.99 | 55.36 | 289 | 174 | 4 |
| unnamed | gi 49839960: | 35.99 | 55.36 | 289 | 174 | 4 |
| unnamed | gi 498393274 | 35.99 | 55.36 | 289 | 174 | 4 |
| unnamed | gi 49851772: | 35.99 | 55.02 | 289 | 174 | 4 |
| unnamed | gi 54730129: | 37.76 | 57.34 | 286 | 161 | 8 |
| unnamed | gi 48829626: | 35.64 | 55.02 | 289 | 175 | 4 |
| unnamed | gi 57366343: | 35.64 | 55.36 | 289 | 175 | 4 |
| unnamed | gi 313630204 | 39.09 | 59.26 | 243 | 146 | 2 |
| unnamed | gi 48831578: | 35.64 | 55.02 | 289 | 175 | 4 |
| unnamed | gi 48833175: | 35.64 | 55.02 | 289 | 175 | 4 |
| unnamed | gi 48867477: | 38.89 | 58.68 | 288 | 155 | 9 |

|         |              |       |       |     |     |   |
|---------|--------------|-------|-------|-----|-----|---|
| unnamed | gi 488338459 | 35.99 | 54.67 | 289 | 174 | 4 |
| unnamed | gi 488326619 | 35.64 | 55.02 | 289 | 175 | 4 |
| unnamed | gi 488323317 | 36.82 | 55.6  | 277 | 164 | 4 |
| unnamed | gi 488325353 | 35.64 | 55.02 | 289 | 175 | 4 |
| unnamed | gi 488319236 | 35.29 | 54.67 | 289 | 176 | 4 |
| unnamed | gi 544986196 | 41.95 | 57.2  | 236 | 132 | 3 |
| unnamed | gi 34761997  | 34.95 | 54.33 | 289 | 177 | 4 |
| unnamed | gi 546668083 | 34.46 | 56.76 | 296 | 172 | 7 |
| unnamed | gi 498266519 | 35.37 | 56.12 | 294 | 172 | 6 |
| unnamed | gi 545029898 | 39.83 | 56.36 | 236 | 138 | 2 |
| unnamed | gi 544958607 | 39.83 | 56.36 | 236 | 138 | 2 |
| unnamed | gi 515099337 | 39.83 | 55.93 | 236 | 138 | 2 |
| unnamed | gi 495998060 | 35.31 | 53.85 | 286 | 172 | 5 |
| unnamed | gi 544972433 | 39.41 | 56.36 | 236 | 139 | 2 |
| unnamed | gi 544967596 | 39.41 | 55.93 | 236 | 139 | 2 |
| unnamed | gi 545016443 | 39.41 | 55.51 | 236 | 139 | 2 |
| unnamed | gi 544959667 | 38.98 | 55.51 | 236 | 140 | 2 |
| unnamed | gi 496653627 | 32.14 | 53.25 | 308 | 169 | 6 |
| unnamed | gi 498473699 | 31.97 | 56.12 | 294 | 182 | 6 |
| unnamed | gi 489594507 | 32.14 | 53.25 | 308 | 169 | 6 |
| unnamed | gi 493485496 | 33.56 | 55.14 | 292 | 169 | 6 |
| unnamed | gi 514895297 | 37.12 | 56.44 | 264 | 155 | 6 |
| unnamed | gi 511046877 | 36.1  | 54.31 | 313 | 170 | 7 |
| unnamed | gi 495142969 | 34.97 | 54.2  | 286 | 169 | 6 |
| unnamed | gi 544962094 | 39.41 | 55.08 | 236 | 139 | 2 |
| unnamed | gi 514885634 | 35.64 | 54.67 | 289 | 175 | 4 |
| unnamed | gi 488262913 | 31.63 | 55.78 | 294 | 183 | 6 |
| unnamed | gi 488246683 | 31.63 | 55.78 | 294 | 183 | 6 |
| unnamed | gi 497582333 | 38.98 | 55.08 | 236 | 140 | 2 |
| unnamed | gi 494983819 | 33.69 | 56.38 | 282 | 176 | 6 |
| unnamed | gi 383329398 | 31.63 | 55.78 | 294 | 183 | 6 |
| unnamed | gi 544957514 | 38.56 | 55.51 | 236 | 141 | 2 |
| unnamed | gi 389869256 | 31.63 | 55.78 | 294 | 183 | 6 |
| unnamed | gi 497588389 | 38.56 | 55.51 | 236 | 141 | 2 |
| unnamed | gi 488234989 | 31.63 | 55.78 | 294 | 183 | 6 |
| unnamed | gi 489531927 | 38.56 | 55.51 | 236 | 141 | 2 |
| unnamed | gi 126699164 | 38.56 | 55.51 | 236 | 141 | 2 |
| unnamed | gi 498421399 | 31.63 | 55.78 | 294 | 183 | 6 |
| unnamed | gi 488307533 | 31.63 | 55.78 | 294 | 183 | 6 |
| unnamed | gi 545047927 | 38.98 | 55.08 | 236 | 140 | 2 |
| unnamed | gi 545026583 | 38.14 | 55.51 | 236 | 142 | 2 |

|         |              |       |       |     |     |   |
|---------|--------------|-------|-------|-----|-----|---|
| unnamed | gi 544953439 | 38.56 | 55.08 | 236 | 141 | 2 |
| unnamed | gi 493835469 | 36.01 | 56.64 | 286 | 172 | 5 |
| unnamed | gi 488223920 | 31.63 | 55.44 | 294 | 183 | 6 |
| unnamed | gi 544978114 | 38.56 | 55.08 | 236 | 141 | 2 |
| unnamed | gi 514881779 | 34.23 | 57.31 | 260 | 166 | 3 |
| unnamed | gi 549299320 | 45.21 | 60.11 | 188 | 99  | 2 |
| unnamed | gi 498408809 | 32.55 | 55.37 | 298 | 177 | 7 |
| unnamed | gi 547313959 | 35.37 | 52.41 | 311 | 165 | 8 |
| unnamed | gi 544955119 | 38.14 | 55.08 | 236 | 142 | 2 |
| unnamed | gi 392988899 | 32.55 | 55.03 | 298 | 177 | 7 |
| unnamed | gi 486822869 | 33.33 | 56.2  | 258 | 160 | 5 |
| unnamed | gi 514892960 | 33.46 | 57.31 | 260 | 168 | 3 |
| unnamed | gi 488273240 | 32.95 | 56.59 | 258 | 161 | 5 |
| unnamed | gi 491375159 | 33.46 | 57.31 | 260 | 168 | 3 |
| unnamed | gi 488237349 | 32.95 | 56.59 | 258 | 161 | 5 |
| unnamed | gi 495657240 | 33.46 | 57.31 | 260 | 168 | 3 |
| unnamed | gi 488274068 | 31.6  | 56.13 | 269 | 173 | 5 |
| unnamed | gi 488221619 | 32.95 | 56.59 | 258 | 161 | 5 |
| unnamed | gi 488243459 | 32.95 | 56.59 | 258 | 161 | 5 |
| unnamed | gi 488264799 | 32.95 | 56.59 | 258 | 161 | 5 |
| unnamed | gi 488249069 | 32.95 | 56.59 | 258 | 161 | 5 |
| unnamed | gi 260683179 | 37.29 | 55.08 | 236 | 144 | 2 |
| unnamed | gi 498415649 | 32.95 | 56.59 | 258 | 161 | 5 |
| unnamed | gi 488269699 | 32.95 | 56.59 | 258 | 161 | 5 |
| unnamed | gi 544963329 | 38.56 | 54.24 | 236 | 141 | 2 |
| unnamed | gi 514906238 | 32.95 | 56.59 | 258 | 161 | 5 |
| unnamed | gi 488271640 | 32.56 | 56.2  | 258 | 162 | 5 |
| unnamed | gi 488229240 | 32.56 | 56.59 | 258 | 162 | 5 |
| unnamed | gi 547940239 | 33.45 | 56.76 | 296 | 181 | 9 |
| unnamed | gi 547848729 | 35.16 | 52.01 | 273 | 166 | 6 |
| unnamed | gi 488637369 | 35.19 | 54.36 | 287 | 173 | 6 |
| unnamed | gi 488661184 | 35.19 | 54.36 | 287 | 173 | 6 |
| unnamed | gi 488634559 | 35.19 | 54.36 | 287 | 173 | 6 |
| unnamed | gi 547964959 | 35.14 | 51.45 | 276 | 168 | 6 |
| unnamed | gi 510872560 | 33.77 | 53.57 | 308 | 171 | 8 |
| unnamed | gi 258515768 | 34.04 | 56.03 | 282 | 176 | 6 |
| unnamed | gi 488632769 | 34.84 | 54.36 | 287 | 174 | 6 |
| unnamed | gi 494096919 | 35.21 | 54.23 | 284 | 171 | 6 |
| unnamed | gi 547791029 | 35.69 | 54.77 | 283 | 169 | 6 |
| unnamed | gi 488647839 | 35.69 | 54.77 | 283 | 169 | 6 |
| unnamed | gi 589402469 | 35.79 | 57.19 | 285 | 166 | 9 |

|         |              |       |       |     |     |    |
|---------|--------------|-------|-------|-----|-----|----|
| unnamed | gi 54679876! | 34.84 | 54.36 | 287 | 174 | 6  |
| unnamed | gi 49069648! | 33.45 | 51.22 | 287 | 168 | 6  |
| unnamed | gi 48952502! | 44.09 | 58.6  | 186 | 100 | 2  |
| unnamed | gi 51080260! | 31.08 | 53.72 | 296 | 183 | 7  |
| unnamed | gi 48942280! | 81.25 | 91.25 | 80  | 15  | 0  |
| unnamed | gi 49253932! | 30.33 | 52.33 | 300 | 180 | 6  |
| unnamed | gi 49844698! | 33.74 | 53.66 | 246 | 153 | 3  |
| unnamed | gi 55868525! | 32.87 | 56.4  | 289 | 180 | 6  |
| unnamed | gi 54783481! | 31.85 | 58.56 | 292 | 183 | 7  |
| unnamed | gi 51103338! | 32.08 | 49.06 | 318 | 175 | 7  |
| unnamed | gi 30238672! | 34.16 | 54.09 | 281 | 172 | 7  |
| unnamed | gi 54564017! | 36.55 | 53.41 | 249 | 148 | 5  |
| unnamed | gi 54825917! | 32.01 | 54.32 | 278 | 176 | 6  |
| unnamed | gi 49843050! | 32.18 | 56.06 | 289 | 182 | 6  |
| unnamed | gi 49295036! | 29.89 | 52.31 | 281 | 182 | 5  |
| unnamed | gi 54746791! | 36.44 | 56.44 | 225 | 129 | 5  |
| unnamed | gi 49806084! | 31.36 | 49.83 | 287 | 174 | 6  |
| unnamed | gi 54504399! | 51.95 | 62.99 | 154 | 69  | 3  |
| unnamed | gi 49093553! | 28.47 | 54.17 | 288 | 195 | 5  |
| unnamed | gi 49391030! | 35.14 | 50.34 | 296 | 166 | 6  |
| unnamed | gi 49016626! | 32.88 | 55.48 | 292 | 181 | 7  |
| unnamed | gi 47914803! | 35.14 | 50.34 | 296 | 166 | 6  |
| unnamed | gi 47920257! | 35.14 | 50.34 | 296 | 166 | 6  |
| unnamed | gi 51105247! | 33.76 | 51.91 | 314 | 175 | 10 |
| unnamed | gi 54788503! | 35.51 | 54.21 | 214 | 129 | 3  |
| unnamed | gi 54647292! | 33.92 | 53    | 283 | 174 | 6  |
| unnamed | gi 49339923! | 30.47 | 51.25 | 279 | 180 | 3  |
| unnamed | gi 54773079! | 34.69 | 51.43 | 245 | 142 | 5  |
| unnamed | gi 49382936! | 40.31 | 58.64 | 191 | 105 | 5  |
| unnamed | gi 54731331! | 33.6  | 55.34 | 253 | 149 | 7  |
| unnamed | gi 49657118! | 29.49 | 53.22 | 295 | 186 | 6  |
| unnamed | gi 54721301! | 32.29 | 55.21 | 288 | 177 | 8  |
| unnamed | gi 54790998! | 31.27 | 49.85 | 323 | 169 | 10 |
| unnamed | gi 54832906! | 32.4  | 52.4  | 250 | 153 | 4  |
| unnamed | gi 49094142! | 33.73 | 54.22 | 249 | 152 | 6  |
| unnamed | gi 54821953! | 35.86 | 54.48 | 290 | 172 | 7  |
| unnamed | gi 54566841! | 33.76 | 51.28 | 234 | 147 | 5  |
| unnamed | gi 49650759! | 31.78 | 50    | 258 | 161 | 6  |
| unnamed | gi 51102977! | 33.33 | 53.33 | 240 | 143 | 5  |
| unnamed | gi 54640509! | 28.42 | 48.63 | 292 | 193 | 7  |
| unnamed | gi 54774018! | 30.67 | 50    | 326 | 172 | 9  |

|         |              |       |       |     |     |    |
|---------|--------------|-------|-------|-----|-----|----|
| unnamed | gi 49361909f | 30.88 | 53.68 | 285 | 180 | 6  |
| unnamed | gi 54786796f | 34.07 | 53.1  | 226 | 144 | 4  |
| unnamed | gi 51176380f | 35.25 | 52.05 | 244 | 145 | 6  |
| unnamed | gi 31312446f | 35.66 | 51.64 | 244 | 144 | 6  |
| unnamed | gi 48971187f | 35.66 | 51.64 | 244 | 144 | 6  |
| unnamed | gi 11651469f | 35.92 | 52.24 | 245 | 142 | 7  |
| unnamed | gi 49539368f | 30.98 | 48.48 | 297 | 166 | 10 |
| unnamed | gi 34753148f | 31.4  | 52.07 | 242 | 144 | 5  |
| unnamed | gi 53785424f | 31.27 | 46.72 | 259 | 155 | 6  |
| unnamed | gi 54818783f | 28.98 | 51.94 | 283 | 180 | 7  |
| unnamed | gi 48970801f | 35.51 | 52.24 | 245 | 143 | 7  |
| unnamed | gi 16087972f | 27.72 | 49.82 | 285 | 196 | 6  |
| unnamed | gi 48868533f | 27.21 | 51.36 | 294 | 194 | 6  |
| unnamed | gi 48971790f | 35.51 | 51.84 | 245 | 143 | 7  |
| unnamed | gi 49383163f | 31.31 | 51.18 | 297 | 169 | 9  |
| unnamed | gi 54789582f | 27.21 | 51.02 | 294 | 194 | 6  |
| unnamed | gi 49656975f | 27.21 | 51.02 | 294 | 194 | 6  |
| unnamed | gi 49475469f | 28.07 | 50.18 | 285 | 189 | 5  |
| unnamed | gi 54540156f | 27.39 | 46.5  | 314 | 181 | 6  |
| unnamed | gi 49654887f | 27.52 | 48.66 | 298 | 174 | 7  |
| unnamed | gi 37429794f | 32.62 | 54.08 | 233 | 143 | 5  |
| unnamed | gi 54712686f | 28.16 | 51.13 | 309 | 188 | 7  |
| unnamed | gi 49513443f | 28.47 | 50.51 | 295 | 178 | 8  |
| unnamed | gi 49609232f | 27.21 | 50.68 | 294 | 194 | 6  |
| unnamed | gi 54539483f | 27.92 | 47.4  | 308 | 170 | 8  |
| unnamed | gi 49655124f | 27.72 | 49.82 | 285 | 190 | 5  |
| unnamed | gi 54796103f | 30.64 | 48.48 | 297 | 167 | 10 |
| unnamed | gi 54824687f | 32.63 | 50.42 | 236 | 143 | 4  |
| unnamed | gi 49727439f | 26.87 | 50.68 | 294 | 195 | 6  |
| unnamed | gi 54794440f | 27.46 | 51.76 | 284 | 183 | 8  |
| unnamed | gi 10477457f | 35.1  | 51.84 | 245 | 144 | 7  |
| unnamed | gi 48972029f | 35.1  | 51.84 | 245 | 144 | 7  |
| unnamed | gi 54469202f | 56.67 | 74.44 | 90  | 37  | 1  |
| unnamed | gi 49567377f | 30.6  | 46.64 | 268 | 156 | 6  |
| unnamed | gi 54820480f | 40.67 | 59.33 | 150 | 84  | 2  |
| unnamed | gi 49573728f | 31.66 | 49.03 | 259 | 161 | 6  |
| unnamed | gi 49724365f | 32.05 | 49.03 | 259 | 160 | 7  |
| unnamed | gi 47933869f | 39.16 | 54.55 | 143 | 86  | 1  |
| unnamed | gi 49355194f | 41.48 | 62.96 | 135 | 78  | 1  |
| unnamed | gi 49383712f | 28.83 | 49.47 | 281 | 181 | 6  |
| unnamed | gi 49729280f | 28.83 | 49.47 | 281 | 181 | 6  |



|         |              |       |       |     |     |    |
|---------|--------------|-------|-------|-----|-----|----|
| unnamed | gi 495677739 | 29.11 | 47.6  | 292 | 170 | 8  |
| unnamed | gi 547203489 | 29.11 | 47.6  | 292 | 170 | 8  |
| unnamed | gi 545389680 | 30.3  | 51.08 | 231 | 148 | 4  |
| unnamed | gi 495992857 | 25.84 | 47.65 | 298 | 185 | 7  |
| unnamed | gi 494993779 | 28.57 | 50.34 | 294 | 175 | 9  |
| unnamed | gi 489595917 | 29.83 | 48.32 | 238 | 146 | 5  |
| unnamed | gi 496656400 | 29.83 | 48.32 | 238 | 146 | 5  |
| unnamed | gi 547944954 | 32.73 | 54.09 | 220 | 133 | 7  |
| unnamed | gi 496063679 | 27.21 | 49.12 | 283 | 185 | 5  |
| unnamed | gi 589401890 | 30.17 | 46.78 | 295 | 173 | 8  |
| unnamed | gi 495986139 | 29.63 | 53.97 | 189 | 125 | 3  |
| unnamed | gi 547726263 | 32.73 | 52.27 | 220 | 132 | 5  |
| unnamed | gi 547469410 | 33.1  | 53.1  | 290 | 167 | 9  |
| unnamed | gi 512176133 | 30.04 | 51.57 | 223 | 135 | 6  |
| unnamed | gi 488636023 | 25.16 | 46.27 | 322 | 197 | 9  |
| unnamed | gi 488628304 | 25.16 | 46.58 | 322 | 197 | 9  |
| unnamed | gi 565632697 | 29.72 | 53.3  | 212 | 142 | 3  |
| unnamed | gi 547883763 | 26.86 | 49.47 | 283 | 182 | 10 |
| unnamed | gi 495672777 | 28.04 | 52.03 | 296 | 176 | 13 |
| unnamed | gi 547229487 | 28.38 | 52.03 | 296 | 175 | 13 |
| unnamed | gi 548181708 | 31.34 | 52.74 | 201 | 126 | 5  |
| unnamed | gi 479337380 | 27.7  | 51.69 | 296 | 177 | 13 |
| unnamed | gi 597828184 | 31.54 | 45.77 | 260 | 154 | 6  |
| unnamed | gi 496989177 | 25.74 | 45.22 | 272 | 158 | 4  |
| unnamed | gi 489510584 | 29.83 | 45.8  | 238 | 152 | 4  |
| unnamed | gi 497218257 | 26.3  | 51.11 | 270 | 178 | 9  |
| unnamed | gi 497220197 | 27.44 | 47.74 | 266 | 153 | 6  |
| unnamed | gi 497222217 | 25.37 | 44.85 | 272 | 159 | 4  |
| unnamed | gi 493837124 | 32.5  | 52.5  | 200 | 115 | 6  |
| unnamed | gi 547964600 | 26.86 | 45.63 | 309 | 178 | 9  |
| unnamed | gi 547847547 | 26.54 | 44.66 | 309 | 179 | 8  |
| unnamed | gi 547718247 | 25.1  | 50.59 | 255 | 173 | 5  |
| unnamed | gi 545043990 | 38.46 | 58.46 | 130 | 73  | 3  |
| unnamed | gi 494269908 | 28.21 | 45.71 | 280 | 165 | 7  |
| unnamed | gi 511081549 | 24.56 | 44.84 | 281 | 191 | 8  |
| unnamed | gi 488661507 | 24.12 | 45.02 | 311 | 188 | 8  |
| unnamed | gi 495671543 | 25.51 | 48.56 | 243 | 154 | 7  |
| unnamed | gi 488638588 | 24.12 | 45.02 | 311 | 188 | 8  |
| unnamed | gi 547228473 | 25.51 | 48.56 | 243 | 154 | 7  |
| unnamed | gi 496065414 | 30.3  | 50.22 | 231 | 140 | 7  |
| unnamed | gi 547301293 | 27.19 | 47.81 | 228 | 146 | 6  |

|         |              |       |       |     |     |    |
|---------|--------------|-------|-------|-----|-----|----|
| unnamed | gi 55122149: | 24.24 | 42.93 | 198 | 133 | 4  |
| unnamed | gi 56826555: | 32.63 | 49.47 | 190 | 109 | 8  |
| unnamed | gi 49382935: | 26.75 | 47.37 | 228 | 147 | 6  |
| unnamed | gi 55122075: | 23.27 | 48.51 | 202 | 135 | 4  |
| unnamed | gi 49626797: | 23.57 | 45.71 | 280 | 192 | 7  |
| unnamed | gi 48867478: | 26.75 | 47.81 | 228 | 147 | 6  |
| unnamed | gi 54794500: | 26.2  | 46.72 | 229 | 141 | 7  |
| unnamed | gi 54562504: | 22.18 | 46.13 | 284 | 193 | 9  |
| unnamed | gi 56589672: | 29.75 | 50.41 | 242 | 138 | 11 |
| unnamed | gi 49736173: | 28.42 | 45.79 | 190 | 112 | 7  |
| unnamed | gi 15001519: | 29.75 | 50.41 | 242 | 138 | 11 |
| unnamed | gi 13430066: | 30.24 | 47.18 | 248 | 150 | 9  |
| unnamed | gi 57354745: | 30.85 | 43.78 | 201 | 98  | 7  |
| unnamed | gi 11456714: | 28.92 | 46.18 | 249 | 118 | 11 |
| unnamed | gi 32679126: | 27.38 | 45.63 | 252 | 152 | 8  |
| unnamed | gi 51511288: | 33.71 | 45.71 | 175 | 97  | 6  |
| unnamed | gi 22631515: | 33.71 | 45.71 | 175 | 97  | 6  |
| unnamed | gi 51820986: | 31.02 | 47.06 | 187 | 110 | 6  |
| unnamed | gi 51582172: | 33.14 | 45.71 | 175 | 98  | 6  |
| unnamed | gi 49499402: | 33.14 | 45.71 | 175 | 98  | 6  |
| unnamed | gi 51577714: | 29.75 | 48.76 | 242 | 138 | 11 |
| unnamed | gi 49669433: | 31.02 | 46.52 | 187 | 110 | 6  |
| unnamed | gi 51758817: | 30.5  | 47.5  | 200 | 118 | 8  |
| unnamed | gi 48877652: | 28.97 | 47.66 | 214 | 129 | 7  |
| unnamed | gi 49505248: | 32    | 44    | 175 | 100 | 6  |
| unnamed | gi 49238585: | 32    | 44    | 175 | 100 | 6  |
| unnamed | gi 55904026: | 29.71 | 47.43 | 175 | 104 | 6  |
| unnamed | gi 38445527: | 30.43 | 48.79 | 207 | 122 | 9  |
| unnamed | gi 28211483: | 26.61 | 47.98 | 248 | 158 | 8  |
| unnamed | gi 49470520: | 30.58 | 49.03 | 206 | 121 | 9  |
| unnamed | gi 34273184: | 30.58 | 49.03 | 206 | 121 | 9  |
| unnamed | gi 49295120: | 23.36 | 44.53 | 274 | 184 | 7  |
| unnamed | gi 49238618: | 27.8  | 41.31 | 259 | 151 | 9  |
| unnamed | gi 49506125: | 27.8  | 41.31 | 259 | 151 | 9  |
| unnamed | gi 49606817: | 30.43 | 58.26 | 115 | 76  | 3  |
| unnamed | gi 33433969: | 30.65 | 47.74 | 199 | 113 | 9  |
| unnamed | gi 48963510: | 30.43 | 58.26 | 115 | 76  | 3  |
| unnamed | gi 55015677: | 31.53 | 50.25 | 203 | 118 | 9  |
| unnamed | gi 55760590: | 27.02 | 47.58 | 248 | 157 | 8  |
| unnamed | gi 25179672: | 29    | 44.5  | 200 | 121 | 7  |
| unnamed | gi 33280028: | 31.16 | 46.73 | 199 | 110 | 8  |

|         |              |       |       |     |     |    |
|---------|--------------|-------|-------|-----|-----|----|
| unnamed | gi 497362428 | 27.5  | 45.5  | 200 | 124 | 8  |
| unnamed | gi 583920888 | 32.02 | 45.51 | 178 | 102 | 6  |
| unnamed | gi 489435779 | 30.54 | 50.74 | 203 | 120 | 9  |
| unnamed | gi 310657753 | 33.66 | 47.8  | 205 | 116 | 9  |
| unnamed | gi 491356670 | 39.24 | 67.09 | 79  | 44  | 3  |
| unnamed | gi 547451480 | 27.63 | 45.14 | 257 | 143 | 10 |
| unnamed | gi 489520303 | 30.43 | 47.39 | 230 | 131 | 11 |
| unnamed | gi 489513068 | 30.87 | 47.83 | 230 | 130 | 11 |
| unnamed | gi 495575063 | 29.05 | 45.25 | 179 | 108 | 6  |
| unnamed | gi 545026238 | 30.43 | 47.39 | 230 | 131 | 11 |
| unnamed | gi 545382830 | 28.16 | 48.06 | 206 | 124 | 8  |
| unnamed | gi 511071587 | 28.57 | 48.81 | 168 | 94  | 4  |
| unnamed | gi 544961660 | 30.43 | 47.39 | 230 | 131 | 11 |
| unnamed | gi 494496963 | 27.63 | 45.14 | 257 | 143 | 10 |
| unnamed | gi 544968447 | 30.43 | 47.39 | 230 | 131 | 11 |
| unnamed | gi 260682243 | 30.43 | 47.39 | 230 | 131 | 11 |
| unnamed | gi 126698127 | 30.43 | 47.39 | 230 | 131 | 11 |
| unnamed | gi 544971788 | 30.43 | 47.39 | 230 | 131 | 11 |
| unnamed | gi 550916827 | 29.95 | 49.24 | 197 | 118 | 8  |
| unnamed | gi 515099347 | 30.43 | 47.39 | 230 | 131 | 11 |
| unnamed | gi 261406400 | 27.36 | 47.76 | 201 | 125 | 9  |
| unnamed | gi 494214934 | 28.86 | 46.77 | 201 | 122 | 8  |
| unnamed | gi 489515287 | 42.47 | 58.9  | 73  | 37  | 2  |
| unnamed | gi 545058590 | 32.46 | 50.26 | 191 | 102 | 7  |
| unnamed | gi 489485093 | 26.74 | 45.99 | 187 | 118 | 7  |
| unnamed | gi 573574564 | 34.44 | 57.78 | 90  | 59  | 0  |
| unnamed | gi 517950747 | 31.49 | 45.86 | 181 | 105 | 8  |
| unnamed | gi 495702243 | 31.02 | 50.27 | 187 | 109 | 9  |
| unnamed | gi 495956434 | 29.9  | 49.51 | 204 | 103 | 9  |
| unnamed | gi 545055293 | 32.46 | 50.26 | 191 | 102 | 7  |
| unnamed | gi 515948650 | 29.03 | 42.47 | 186 | 113 | 6  |
| unnamed | gi 451817210 | 28.71 | 48.51 | 202 | 122 | 9  |
| unnamed | gi 489417647 | 28.72 | 49.23 | 195 | 106 | 7  |
| unnamed | gi 515816733 | 25.23 | 49.07 | 214 | 120 | 10 |
| unnamed | gi 288555207 | 28.65 | 44.86 | 185 | 107 | 6  |
| unnamed | gi 488646109 | 31.85 | 51.11 | 135 | 78  | 5  |
| unnamed | gi 489505957 | 31.58 | 51.13 | 133 | 81  | 4  |
| unnamed | gi 489525200 | 33.09 | 50.74 | 136 | 69  | 5  |
| unnamed | gi 251796679 | 31.61 | 45.98 | 174 | 100 | 7  |
| unnamed | gi 496459153 | 28.34 | 50.8  | 187 | 114 | 7  |
| unnamed | gi 512485120 | 28.22 | 42.08 | 202 | 110 | 7  |

|         |              |       |       |     |     |    |
|---------|--------------|-------|-------|-----|-----|----|
| unnamed | gi 547847548 | 29.53 | 49.66 | 149 | 94  | 4  |
| unnamed | gi 517499690 | 29.69 | 42.71 | 192 | 114 | 7  |
| unnamed | gi 331270593 | 29.65 | 45.73 | 199 | 117 | 7  |
| unnamed | gi 599128647 | 29.51 | 45.36 | 183 | 114 | 6  |
| unnamed | gi 489493583 | 25.48 | 46.63 | 208 | 133 | 8  |
| unnamed | gi 544868809 | 30.6  | 47.54 | 183 | 106 | 7  |
| unnamed | gi 497279290 | 27.27 | 46.52 | 187 | 117 | 8  |
| unnamed | gi 550549850 | 28.11 | 44.32 | 185 | 108 | 6  |
| unnamed | gi 158319153 | 28.14 | 48.24 | 199 | 115 | 8  |
| unnamed | gi 492906410 | 29.65 | 43.02 | 172 | 106 | 4  |
| unnamed | gi 516287724 | 33.33 | 61.29 | 93  | 56  | 3  |
| unnamed | gi 544984997 | 32.85 | 48.91 | 137 | 82  | 4  |
| unnamed | gi 517588884 | 26.8  | 47.42 | 194 | 121 | 6  |
| unnamed | gi 547295219 | 27.08 | 49.48 | 192 | 129 | 6  |
| unnamed | gi 148378990 | 30.53 | 44.74 | 190 | 111 | 8  |
| unnamed | gi 494213140 | 32.26 | 59.14 | 93  | 61  | 2  |
| unnamed | gi 517205489 | 30.96 | 44.16 | 197 | 114 | 8  |
| unnamed | gi 517420480 | 31.55 | 50.6  | 168 | 93  | 7  |
| unnamed | gi 153932938 | 30.17 | 44.13 | 179 | 106 | 7  |
| unnamed | gi 489483459 | 28.92 | 41.18 | 204 | 103 | 10 |
| unnamed | gi 384047329 | 29.32 | 49.74 | 191 | 115 | 8  |
| unnamed | gi 591273650 | 27.51 | 48.68 | 189 | 117 | 6  |
| unnamed | gi 515984483 | 29.35 | 46.27 | 201 | 121 | 9  |
| unnamed | gi 160879197 | 25.94 | 43.69 | 293 | 181 | 8  |
| unnamed | gi 522105063 | 28.74 | 46.11 | 167 | 104 | 5  |
| unnamed | gi 545381563 | 26.95 | 43.75 | 256 | 157 | 10 |
| unnamed | gi 114567277 | 25.12 | 47.87 | 211 | 134 | 7  |
| unnamed | gi 489549883 | 27.15 | 47.51 | 221 | 138 | 9  |
| unnamed | gi 491697704 | 32.35 | 47.79 | 136 | 66  | 5  |
| unnamed | gi 494996204 | 32.58 | 55.06 | 89  | 53  | 2  |
| unnamed | gi 518363750 | 27.72 | 44.57 | 184 | 108 | 8  |
| unnamed | gi 559779963 | 29.8  | 44.44 | 198 | 118 | 7  |
| unnamed | gi 496754679 | 25.98 | 47.06 | 204 | 129 | 8  |
| unnamed | gi 515821623 | 30    | 45    | 200 | 116 | 9  |
| unnamed | gi 544692019 | 34.44 | 55.56 | 90  | 55  | 1  |
| unnamed | gi 220932330 | 29.61 | 47.49 | 179 | 106 | 7  |
| unnamed | gi 496184387 | 29.47 | 50.53 | 190 | 114 | 8  |
| unnamed | gi 497880200 | 28.12 | 44.79 | 192 | 119 | 7  |
| unnamed | gi 544846168 | 32.35 | 47.06 | 136 | 66  | 5  |
| unnamed | gi 493232798 | 36    | 65.33 | 75  | 46  | 2  |
| unnamed | gi 573531639 | 36    | 65.33 | 75  | 46  | 2  |

|         |              |       |       |     |     |    |
|---------|--------------|-------|-------|-----|-----|----|
| unnamed | gi 147678690 | 25.7  | 45.33 | 214 | 139 | 8  |
| unnamed | gi 497174270 | 25.56 | 45.56 | 180 | 115 | 6  |
| unnamed | gi 494999490 | 29.08 | 44.9  | 196 | 117 | 8  |
| unnamed | gi 518469840 | 26.29 | 44.85 | 194 | 124 | 6  |
| unnamed | gi 493366100 | 26.47 | 46.08 | 204 | 128 | 8  |
| unnamed | gi 573543370 | 38.96 | 62.34 | 77  | 41  | 3  |
| unnamed | gi 573542620 | 26.87 | 45.77 | 201 | 126 | 8  |
| unnamed | gi 489461900 | 25.73 | 47.09 | 206 | 130 | 7  |
| unnamed | gi 517714580 | 36.19 | 51.43 | 105 | 57  | 4  |
| unnamed | gi 517588030 | 35.11 | 58.51 | 94  | 54  | 4  |
| unnamed | gi 515111100 | 30.23 | 45.58 | 215 | 121 | 11 |
| unnamed | gi 565877600 | 30.22 | 44.6  | 139 | 84  | 5  |
| unnamed | gi 226315060 | 30.23 | 45.12 | 215 | 121 | 11 |
| unnamed | gi 187935430 | 28.79 | 41.25 | 257 | 142 | 11 |
| unnamed | gi 489557770 | 26.7  | 47.51 | 221 | 139 | 9  |
| unnamed | gi 565885190 | 34.48 | 57.47 | 87  | 55  | 2  |
| unnamed | gi 489587000 | 29.8  | 43.43 | 198 | 118 | 7  |
| unnamed | gi 491353130 | 29.37 | 51.75 | 143 | 90  | 5  |
| unnamed | gi 515986590 | 28.77 | 46.58 | 219 | 115 | 10 |
| unnamed | gi 489584880 | 30    | 43.16 | 190 | 112 | 7  |
| unnamed | gi 517419820 | 40.43 | 58.51 | 94  | 46  | 4  |
| unnamed | gi 489497470 | 29.47 | 42.63 | 190 | 113 | 7  |
| unnamed | gi 493236110 | 26.37 | 45.27 | 201 | 127 | 8  |
| unnamed | gi 170755260 | 29.47 | 42.63 | 190 | 113 | 7  |
| unnamed | gi 550161310 | 27.6  | 42.19 | 192 | 118 | 8  |
| unnamed | gi 518246350 | 25.49 | 46.57 | 204 | 130 | 8  |
| unnamed | gi 517952490 | 28.44 | 45.87 | 218 | 134 | 10 |
| unnamed | gi 110799110 | 26.24 | 47.51 | 221 | 140 | 9  |
| unnamed | gi 489428800 | 27.6  | 42.19 | 192 | 118 | 8  |
| unnamed | gi 386725120 | 21.1  | 39.45 | 218 | 116 | 5  |
| unnamed | gi 379722370 | 21.1  | 39.45 | 218 | 116 | 5  |
| unnamed | gi 156135800 | 30.05 | 42.08 | 183 | 99  | 7  |
| unnamed | gi 544838490 | 26.92 | 43.96 | 182 | 102 | 6  |
| unnamed | gi 212638020 | 25.98 | 45.59 | 204 | 129 | 8  |
| unnamed | gi 573533340 | 36.36 | 61.04 | 77  | 43  | 3  |
| unnamed | gi 337749440 | 21.1  | 39.45 | 218 | 116 | 5  |
| unnamed | gi 110802270 | 27.73 | 45    | 220 | 138 | 7  |
| unnamed | gi 544696530 | 29.9  | 50    | 194 | 104 | 9  |
| unnamed | gi 575082590 | 28.36 | 44.28 | 201 | 125 | 7  |
| unnamed | gi 497968920 | 29.21 | 44.94 | 178 | 107 | 6  |
| unnamed | gi 489435580 | 27.6  | 42.19 | 192 | 118 | 8  |

|         |              |       |       |     |     |    |
|---------|--------------|-------|-------|-----|-----|----|
| unnamed | gi 544703130 | 28.95 | 43.16 | 190 | 114 | 7  |
| unnamed | gi 515921464 | 28.02 | 41.63 | 257 | 144 | 11 |
| unnamed | gi 220929361 | 27.38 | 44.44 | 252 | 140 | 12 |
| unnamed | gi 387817281 | 28.95 | 43.16 | 190 | 114 | 7  |
| unnamed | gi 489553330 | 26.24 | 47.51 | 221 | 140 | 9  |
| unnamed | gi 226948274 | 28.42 | 44.74 | 190 | 115 | 8  |
| unnamed | gi 557605400 | 31.07 | 44.07 | 177 | 107 | 6  |
| unnamed | gi 497361659 | 23.01 | 43.81 | 226 | 137 | 8  |
| unnamed | gi 489570591 | 26.24 | 47.06 | 221 | 140 | 9  |
| unnamed | gi 498187581 | 22.31 | 43.82 | 251 | 156 | 9  |
| unnamed | gi 56961848  | 25.67 | 43.85 | 187 | 102 | 7  |
| unnamed | gi 550154664 | 28.32 | 47.79 | 113 | 62  | 2  |
| unnamed | gi 516436951 | 25.12 | 48.79 | 207 | 122 | 10 |
| unnamed | gi 546158429 | 24.9  | 43.27 | 245 | 134 | 8  |
| unnamed | gi 489432281 | 28.32 | 47.79 | 113 | 62  | 2  |
| unnamed | gi 489439270 | 28.32 | 47.79 | 113 | 62  | 2  |
| unnamed | gi 488102608 | 26.45 | 42.98 | 242 | 149 | 9  |
| unnamed | gi 408357681 | 30.9  | 45.51 | 178 | 104 | 6  |
| unnamed | gi 489577861 | 27.07 | 45.85 | 229 | 128 | 10 |
| unnamed | gi 517502281 | 27.84 | 48.45 | 97  | 55  | 1  |
| unnamed | gi 188587721 | 30.07 | 48.25 | 143 | 83  | 6  |
| unnamed | gi 496099919 | 28.5  | 45.89 | 207 | 126 | 8  |
| unnamed | gi 546571321 | 24.88 | 40.09 | 217 | 106 | 5  |
| unnamed | gi 489466871 | 30.07 | 48.25 | 143 | 83  | 6  |
| unnamed | gi 573532351 | 27.6  | 45.31 | 192 | 118 | 8  |
| unnamed | gi 516284924 | 27    | 45    | 200 | 125 | 8  |
| unnamed | gi 28211046  | 31.64 | 44.07 | 177 | 106 | 6  |
| unnamed | gi 493726134 | 27.22 | 42.78 | 180 | 111 | 6  |
| unnamed | gi 516804970 | 29.06 | 47.29 | 203 | 104 | 11 |
| unnamed | gi 507024559 | 26.45 | 42.56 | 242 | 149 | 9  |
| unnamed | gi 446733091 | 26.14 | 43.57 | 241 | 149 | 8  |
| unnamed | gi 386721400 | 29.1  | 42.86 | 189 | 114 | 8  |
| unnamed | gi 490578721 | 28.16 | 46.6  | 206 | 124 | 8  |
| unnamed | gi 544846861 | 25.63 | 41.52 | 277 | 168 | 11 |
| unnamed | gi 446733400 | 25.61 | 42.68 | 246 | 154 | 8  |
| unnamed | gi 557621691 | 25.61 | 42.68 | 246 | 154 | 8  |
| unnamed | gi 584455251 | 25    | 41.8  | 256 | 158 | 8  |
| unnamed | gi 153940178 | 27.93 | 41.9  | 179 | 110 | 6  |
| unnamed | gi 490594291 | 25.34 | 47.06 | 221 | 142 | 9  |
| unnamed | gi 573545681 | 40.28 | 61.11 | 72  | 32  | 4  |
| unnamed | gi 294498861 | 27.13 | 48.94 | 188 | 117 | 8  |

|         |              |       |       |     |     |    |
|---------|--------------|-------|-------|-----|-----|----|
| unnamed | gi 54775409! | 29.9  | 45.88 | 194 | 116 | 10 |
| unnamed | gi 59011003! | 27.37 | 43.68 | 190 | 106 | 9  |
| unnamed | gi 44673308! | 25.61 | 42.68 | 246 | 154 | 8  |
| unnamed | gi 49787835! | 34.15 | 57.32 | 82  | 50  | 2  |
| unnamed | gi 51798649! | 27.91 | 40.7  | 172 | 111 | 4  |
| unnamed | gi 48807371! | 26.02 | 41.46 | 246 | 153 | 9  |
| unnamed | gi 57354901! | 27.08 | 44.27 | 192 | 119 | 8  |
| unnamed | gi 50703480! | 26.45 | 42.56 | 242 | 149 | 9  |
| unnamed | gi 49791990! | 27.89 | 45.79 | 190 | 117 | 7  |
| unnamed | gi 48799592! | 26.47 | 42.44 | 238 | 146 | 9  |
| unnamed | gi 54486916! | 30    | 63.75 | 80  | 54  | 2  |
| unnamed | gi 51758441! | 28.18 | 45.3  | 181 | 111 | 7  |
| unnamed | gi 17076056! | 28.42 | 42.63 | 190 | 115 | 7  |
| unnamed | gi 29570418! | 27.13 | 48.94 | 188 | 117 | 8  |
| unnamed | gi 55016057! | 25.94 | 45.75 | 212 | 121 | 10 |
| unnamed | gi 44673309! | 26.14 | 43.15 | 241 | 149 | 8  |
| unnamed | gi 11848000! | 26.14 | 43.15 | 241 | 149 | 8  |
| unnamed | gi 52140608  | 26.14 | 43.15 | 241 | 149 | 8  |
| unnamed | gi 49480746  | 26.14 | 43.15 | 241 | 149 | 8  |
| unnamed | gi 49470724! | 30.26 | 50.66 | 152 | 90  | 7  |
| unnamed | gi 37626882! | 26.14 | 43.15 | 241 | 149 | 8  |
| unnamed | gi 18311293  | 25.34 | 47.06 | 221 | 142 | 9  |
| unnamed | gi 51513511! | 27.53 | 48.88 | 178 | 110 | 7  |
| unnamed | gi 58539601! | 26.64 | 45.56 | 259 | 152 | 13 |
| unnamed | gi 22586689! | 26.14 | 43.15 | 241 | 149 | 8  |
| unnamed | gi 40747306! | 29.5  | 47.48 | 139 | 85  | 5  |
| unnamed | gi 44673309! | 26.14 | 42.32 | 241 | 149 | 8  |
| unnamed | gi 49651670! | 23.26 | 40.7  | 258 | 136 | 8  |
| unnamed | gi 51825370! | 27.22 | 43.89 | 180 | 111 | 6  |
| unnamed | gi 18858490! | 32.17 | 54.78 | 115 | 68  | 5  |
| unnamed | gi 18858931! | 27.08 | 47.92 | 144 | 81  | 6  |
| unnamed | gi 33774527! | 28.57 | 42.86 | 189 | 115 | 8  |
| unnamed | gi 51643776! | 30.23 | 49.61 | 129 | 78  | 5  |
| unnamed | gi 51513625! | 25    | 45.83 | 192 | 121 | 8  |
| unnamed | gi 40691453! | 22.9  | 45.79 | 214 | 136 | 9  |
| unnamed | gi 29570565! | 25.39 | 46.11 | 193 | 119 | 9  |
| unnamed | gi 48954216! | 34.29 | 54.29 | 105 | 59  | 4  |
| unnamed | gi 51613107! | 26.16 | 43.46 | 237 | 146 | 8  |
| unnamed | gi 48943140! | 30.05 | 50.74 | 203 | 121 | 9  |
| unnamed | gi 49421357! | 22.36 | 43.88 | 237 | 159 | 9  |
| unnamed | gi 30105640! | 26.14 | 42.74 | 241 | 149 | 8  |

|         |              |       |       |     |     |    |
|---------|--------------|-------|-------|-----|-----|----|
| unnamed | gi 547233204 | 28.16 | 46.6  | 206 | 112 | 10 |
| unnamed | gi 489383179 | 26.05 | 43.28 | 238 | 147 | 8  |
| unnamed | gi 446735049 | 26.97 | 43.15 | 241 | 147 | 9  |
| unnamed | gi 488058301 | 26.45 | 42.56 | 242 | 149 | 9  |
| unnamed | gi 489388989 | 26.05 | 43.28 | 238 | 147 | 8  |
| unnamed | gi 487930287 | 26.05 | 43.28 | 238 | 147 | 8  |
| unnamed | gi 409739781 | 34.23 | 43.24 | 111 | 63  | 4  |
| unnamed | gi 488772701 | 33.33 | 54.29 | 105 | 60  | 4  |
| unnamed | gi 488053008 | 26.75 | 41.98 | 243 | 147 | 10 |
| unnamed | gi 515986288 | 32.88 | 63.01 | 73  | 47  | 2  |
| unnamed | gi 517581639 | 25.93 | 43.92 | 189 | 117 | 7  |
| unnamed | gi 488041191 | 26.03 | 42.15 | 242 | 150 | 9  |
| unnamed | gi 488088640 | 26.03 | 42.15 | 242 | 150 | 9  |
| unnamed | gi 545059729 | 30.08 | 50.38 | 133 | 77  | 6  |
| unnamed | gi 488017891 | 26.45 | 42.56 | 242 | 149 | 9  |
| unnamed | gi 498363033 | 28.08 | 47.95 | 146 | 87  | 5  |
| unnamed | gi 488096069 | 26.45 | 42.56 | 242 | 149 | 9  |
| unnamed | gi 302873229 | 30.43 | 48.91 | 184 | 102 | 10 |
| unnamed | gi 489468431 | 23.67 | 47.34 | 207 | 125 | 9  |
| unnamed | gi 313203030 | 32.54 | 45.24 | 126 | 79  | 4  |
| unnamed | gi 507007320 | 25.41 | 41.8  | 244 | 157 | 9  |
| unnamed | gi 187934550 | 24.06 | 47.64 | 212 | 118 | 10 |
| unnamed | gi 515921809 | 24.06 | 47.64 | 212 | 118 | 10 |
| unnamed | gi 494672633 | 35.62 | 58.9  | 73  | 41  | 4  |
| unnamed | gi 573540591 | 38.89 | 59.72 | 72  | 33  | 4  |
| unnamed | gi 544869914 | 23.26 | 41.86 | 258 | 174 | 8  |
| unnamed | gi 30264958  | 25.73 | 43.15 | 241 | 150 | 8  |
| unnamed | gi 573587401 | 31.71 | 54.88 | 82  | 50  | 3  |
| unnamed | gi 568809388 | 30.68 | 54.55 | 88  | 58  | 2  |
| unnamed | gi 446733081 | 24.79 | 42.15 | 242 | 153 | 8  |
| unnamed | gi 300855111 | 25.53 | 42.55 | 188 | 124 | 6  |
| unnamed | gi 573548571 | 35.48 | 54.84 | 93  | 55  | 4  |
| unnamed | gi 544839081 | 26.13 | 45.23 | 199 | 120 | 7  |
| unnamed | gi 163942631 | 26.02 | 41.87 | 246 | 153 | 9  |
| unnamed | gi 518752021 | 32.38 | 44.76 | 105 | 61  | 4  |
| unnamed | gi 518688544 | 39.66 | 62.07 | 58  | 34  | 1  |
| unnamed | gi 392393390 | 39.66 | 62.07 | 58  | 34  | 1  |
| unnamed | gi 487966798 | 25.89 | 42.64 | 197 | 121 | 6  |
| unnamed | gi 294500301 | 24.87 | 46.11 | 193 | 120 | 9  |
| unnamed | gi 544704591 | 27.37 | 43.16 | 190 | 117 | 7  |
| unnamed | gi 237794290 | 27.37 | 43.16 | 190 | 117 | 7  |



|         |              |       |       |     |     |    |
|---------|--------------|-------|-------|-----|-----|----|
| unnamed | gi 431792124 | 41.38 | 60.34 | 58  | 33  | 1  |
| unnamed | gi 487942400 | 26.47 | 42.44 | 238 | 146 | 9  |
| unnamed | gi 497564155 | 25.63 | 43.28 | 238 | 148 | 8  |
| unnamed | gi 511048761 | 32.88 | 60.27 | 73  | 49  | 0  |
| unnamed | gi 511048761 | 27    | 46    | 100 | 62  | 2  |
| unnamed | gi 442804629 | 26.74 | 42.78 | 187 | 117 | 7  |
| unnamed | gi 446733088 | 27.27 | 43.94 | 198 | 117 | 8  |
| unnamed | gi 544878840 | 27.08 | 44.27 | 192 | 124 | 7  |
| unnamed | gi 487961231 | 26.47 | 42.44 | 238 | 146 | 9  |
| unnamed | gi 489503134 | 34.29 | 58.57 | 70  | 44  | 2  |
| unnamed | gi 546575284 | 30.95 | 46.83 | 126 | 71  | 6  |
| unnamed | gi 487935391 | 25.63 | 42.86 | 238 | 148 | 8  |
| unnamed | gi 384045804 | 24.87 | 45.08 | 193 | 120 | 9  |
| unnamed | gi 374321289 | 33.8  | 57.75 | 71  | 45  | 2  |
| unnamed | gi 446733088 | 27.27 | 43.94 | 198 | 117 | 8  |
| unnamed | gi 488001601 | 25.89 | 42.13 | 197 | 121 | 6  |
| unnamed | gi 498362511 | 29.11 | 53.16 | 79  | 51  | 2  |
| unnamed | gi 490758384 | 26.51 | 55.42 | 83  | 51  | 3  |
| unnamed | gi 384188971 | 25.2  | 41.06 | 246 | 155 | 8  |
| unnamed | gi 487900668 | 25.51 | 42.91 | 247 | 153 | 10 |
| unnamed | gi 446733061 | 25.93 | 43.21 | 243 | 149 | 10 |
| unnamed | gi 545057450 | 42.86 | 60.71 | 56  | 31  | 1  |
| unnamed | gi 494144721 | 28.49 | 42.46 | 179 | 106 | 7  |
| unnamed | gi 125972581 | 27.47 | 44.51 | 182 | 110 | 8  |
| unnamed | gi 118443280 | 23.9  | 43.41 | 205 | 135 | 6  |
| unnamed | gi 547802518 | 26.56 | 45.31 | 192 | 123 | 8  |
| unnamed | gi 544692181 | 29.23 | 50.77 | 130 | 80  | 5  |
| unnamed | gi 517014161 | 32.86 | 62.86 | 70  | 42  | 1  |
| unnamed | gi 898939301 | 32.86 | 62.86 | 70  | 42  | 1  |
| unnamed | gi 492338020 | 32.86 | 62.86 | 70  | 42  | 1  |
| unnamed | gi 134299989 | 27.14 | 47.74 | 199 | 121 | 8  |
| unnamed | gi 559036131 | 27.5  | 46.5  | 200 | 115 | 11 |
| unnamed | gi 545588254 | 24.34 | 46.03 | 189 | 101 | 9  |
| unnamed | gi 427841011 | 24.79 | 42.15 | 242 | 153 | 8  |
| unnamed | gi 507059870 | 26.45 | 42.15 | 242 | 149 | 9  |
| unnamed | gi 446733124 | 26.45 | 42.15 | 242 | 149 | 9  |
| unnamed | gi 446733399 | 25.2  | 41.87 | 246 | 155 | 8  |
| unnamed | gi 446733071 | 25.2  | 42.28 | 246 | 155 | 9  |
| unnamed | gi 545417240 | 33.33 | 49.52 | 105 | 60  | 4  |
| unnamed | gi 507065110 | 25    | 41.39 | 244 | 158 | 9  |
| unnamed | gi 554377804 | 25.53 | 40.96 | 188 | 124 | 6  |

|         |              |       |       |     |     |    |
|---------|--------------|-------|-------|-----|-----|----|
| unnamed | gi 44673308: | 24.8  | 41.46 | 246 | 156 | 8  |
| unnamed | gi 51083583: | 28.57 | 58.57 | 70  | 50  | 0  |
| unnamed | gi 21796238: | 25.73 | 41.91 | 241 | 150 | 8  |
| unnamed | gi 58539617: | 25    | 44.9  | 196 | 131 | 6  |
| unnamed | gi 51382671: | 26.02 | 41.06 | 246 | 153 | 9  |
| unnamed | gi 51598568: | 24.35 | 47.67 | 193 | 120 | 8  |
| unnamed | gi 51598568: | 32.8  | 49.6  | 125 | 64  | 6  |
| unnamed | gi 40256358: | 24.8  | 41.06 | 246 | 156 | 8  |
| unnamed | gi 49821560: | 26.94 | 43.52 | 193 | 114 | 7  |
| unnamed | gi 48798779: | 28.22 | 44.79 | 163 | 103 | 5  |
| unnamed | gi 51637367: | 24.8  | 41.06 | 246 | 156 | 8  |
| unnamed | gi 44673307: | 26.02 | 41.06 | 246 | 153 | 9  |
| unnamed | gi 16982809: | 30.49 | 53.66 | 82  | 51  | 3  |
| unnamed | gi 39319931: | 29.78 | 45.51 | 178 | 106 | 8  |
| unnamed | gi 15894146: | 25.13 | 44.92 | 187 | 122 | 6  |
| unnamed | gi 54746260: | 27.2  | 46.4  | 125 | 85  | 3  |
| unnamed | gi 48936531: | 25.89 | 41.62 | 197 | 121 | 6  |
| unnamed | gi 49071010: | 30.23 | 44.19 | 129 | 77  | 5  |
| unnamed | gi 58460471: | 30.49 | 53.66 | 82  | 51  | 3  |
| unnamed | gi 30022957: | 24.39 | 41.06 | 246 | 157 | 8  |
| unnamed | gi 48800607: | 26.89 | 42.44 | 238 | 145 | 10 |
| unnamed | gi 51107246: | 23.76 | 41.09 | 202 | 105 | 6  |
| unnamed | gi 56981003: | 23.65 | 46.31 | 203 | 135 | 8  |
| unnamed | gi 50704996: | 26.03 | 42.15 | 242 | 150 | 9  |
| unnamed | gi 54730088: | 25.85 | 48.3  | 147 | 88  | 6  |
| unnamed | gi 40255496: | 23.98 | 41.46 | 246 | 158 | 8  |
| unnamed | gi 49054369: | 25.89 | 43.15 | 197 | 121 | 7  |
| unnamed | gi 51581991: | 31.33 | 61.45 | 83  | 49  | 5  |
| unnamed | gi 48937380: | 25.51 | 42.35 | 196 | 123 | 7  |
| unnamed | gi 44673312: | 26.56 | 41.91 | 241 | 148 | 9  |
| unnamed | gi 44673310: | 25.73 | 41.91 | 241 | 150 | 8  |
| unnamed | gi 38580953: | 24.69 | 41.84 | 239 | 153 | 9  |
| unnamed | gi 50698927: | 24.8  | 40.65 | 246 | 156 | 8  |
| unnamed | gi 29650535: | 23.98 | 41.06 | 246 | 158 | 8  |
| unnamed | gi 51771723: | 27    | 52    | 100 | 64  | 2  |
| unnamed | gi 38418271: | 24.69 | 41.98 | 243 | 152 | 9  |
| unnamed | gi 54469748: | 28.46 | 50    | 130 | 81  | 5  |
| unnamed | gi 49600026: | 29.47 | 53.68 | 95  | 62  | 3  |
| unnamed | gi 54947352: | 34.62 | 53.85 | 78  | 47  | 2  |
| unnamed | gi 48942571: | 35.05 | 48.45 | 97  | 53  | 4  |
| unnamed | gi 52369615: | 27.75 | 44.02 | 209 | 120 | 11 |

|         |              |       |       |     |     |    |
|---------|--------------|-------|-------|-----|-----|----|
| unnamed | gi 222098370 | 25.73 | 41.49 | 241 | 150 | 8  |
| unnamed | gi 514700914 | 22.73 | 41.74 | 242 | 153 | 8  |
| unnamed | gi 218234921 | 24.39 | 41.06 | 246 | 157 | 8  |
| unnamed | gi 489401770 | 25.38 | 41.62 | 197 | 122 | 6  |
| unnamed | gi 493828189 | 25.85 | 47.62 | 147 | 88  | 6  |
| unnamed | gi 487925097 | 25.63 | 42.02 | 238 | 148 | 8  |
| unnamed | gi 497935681 | 24.3  | 52.34 | 107 | 63  | 3  |
| unnamed | gi 258517261 | 22.39 | 47.26 | 201 | 136 | 6  |
| unnamed | gi 573559251 | 24.06 | 40.11 | 187 | 124 | 7  |
| unnamed | gi 489473761 | 34.26 | 50.93 | 108 | 59  | 5  |
| unnamed | gi 495908031 | 22.22 | 43.39 | 189 | 125 | 6  |
| unnamed | gi 317132944 | 24.86 | 44.51 | 173 | 115 | 6  |
| unnamed | gi 490891838 | 22.61 | 44.22 | 199 | 140 | 6  |
| unnamed | gi 376261541 | 25.79 | 44.44 | 252 | 148 | 12 |
| unnamed | gi 446733071 | 24.49 | 41.22 | 245 | 158 | 9  |
| unnamed | gi 488127080 | 24.87 | 41.62 | 197 | 123 | 6  |
| unnamed | gi 518546021 | 21.72 | 41.39 | 244 | 145 | 8  |
| unnamed | gi 497277581 | 33.33 | 58.62 | 87  | 56  | 2  |
| unnamed | gi 446733090 | 24.49 | 42.45 | 245 | 158 | 10 |
| unnamed | gi 446733064 | 24.7  | 40.89 | 247 | 155 | 9  |
| unnamed | gi 491041639 | 23.76 | 44.06 | 202 | 134 | 8  |
| unnamed | gi 547269608 | 27.27 | 49.59 | 121 | 65  | 5  |
| unnamed | gi 446733061 | 24.39 | 41.06 | 246 | 157 | 8  |
| unnamed | gi 120437761 | 24.03 | 48.84 | 129 | 85  | 4  |
| unnamed | gi 495138871 | 26.8  | 50.52 | 97  | 66  | 3  |
| unnamed | gi 490138184 | 26.06 | 44.15 | 188 | 104 | 8  |
| unnamed | gi 515717591 | 26.77 | 41.41 | 198 | 118 | 8  |
| unnamed | gi 573535081 | 30.48 | 44.76 | 105 | 63  | 4  |
| unnamed | gi 446733074 | 25.2  | 41.06 | 246 | 155 | 9  |
| unnamed | gi 545416451 | 29.67 | 44.02 | 209 | 118 | 11 |
| unnamed | gi 407707421 | 29.2  | 43.8  | 137 | 85  | 4  |
| unnamed | gi 545587171 | 30.33 | 42.62 | 122 | 72  | 4  |
| unnamed | gi 446733061 | 24.39 | 41.06 | 246 | 157 | 8  |
| unnamed | gi 507039204 | 24.39 | 41.06 | 246 | 157 | 8  |
| unnamed | gi 446733061 | 25.2  | 41.87 | 246 | 155 | 9  |
| unnamed | gi 544705881 | 27.81 | 40.64 | 187 | 117 | 6  |
| unnamed | gi 487968981 | 24.87 | 41.62 | 197 | 123 | 6  |
| unnamed | gi 490755321 | 28.17 | 46.48 | 213 | 124 | 11 |
| unnamed | gi 573551101 | 29.52 | 47.62 | 105 | 64  | 4  |
| unnamed | gi 510837381 | 44    | 54    | 50  | 27  | 1  |
| unnamed | gi 261404561 | 33.33 | 58.62 | 87  | 56  | 2  |

|         |              |       |       |     |     |    |
|---------|--------------|-------|-------|-----|-----|----|
| unnamed | gi 573548520 | 24.65 | 41.86 | 215 | 142 | 7  |
| unnamed | gi 449091870 | 24.39 | 40.65 | 246 | 157 | 8  |
| unnamed | gi 575083040 | 26.6  | 46.28 | 188 | 114 | 8  |
| unnamed | gi 158339410 | 22.74 | 39.71 | 277 | 168 | 12 |
| unnamed | gi 488772190 | 26.67 | 43.08 | 195 | 119 | 8  |
| unnamed | gi 305666010 | 26.62 | 42.45 | 139 | 86  | 3  |
| unnamed | gi 487990320 | 24.87 | 41.62 | 197 | 123 | 6  |
| unnamed | gi 387817670 | 26.74 | 42.78 | 187 | 119 | 7  |
| unnamed | gi 487927870 | 24.87 | 41.62 | 197 | 123 | 6  |
| unnamed | gi 489396670 | 24.87 | 41.12 | 197 | 123 | 6  |
| unnamed | gi 251798220 | 25.27 | 44.51 | 182 | 107 | 8  |
| unnamed | gi 487932430 | 24.87 | 41.62 | 197 | 123 | 6  |
| unnamed | gi 229917080 | 25    | 41.67 | 180 | 113 | 5  |
| unnamed | gi 573567430 | 22.49 | 44.98 | 249 | 153 | 10 |
| unnamed | gi 489453360 | 27.27 | 40.11 | 187 | 118 | 6  |
| unnamed | gi 547736210 | 30.7  | 49.12 | 114 | 74  | 4  |
| unnamed | gi 517762350 | 24.42 | 54.65 | 86  | 61  | 2  |
| unnamed | gi 547924490 | 29.55 | 51.14 | 88  | 50  | 3  |
| unnamed | gi 237794750 | 27.37 | 40.53 | 190 | 120 | 6  |
| unnamed | gi 487982400 | 32.04 | 46.6  | 103 | 60  | 3  |
| unnamed | gi 376259930 | 23.81 | 48.57 | 105 | 65  | 3  |
| unnamed | gi 489586540 | 24.87 | 42.86 | 189 | 126 | 5  |
| unnamed | gi 489399190 | 32.04 | 46.6  | 103 | 60  | 3  |
| unnamed | gi 495058470 | 29.27 | 47.56 | 82  | 55  | 1  |
| unnamed | gi 350268190 | 22.59 | 42.26 | 239 | 149 | 8  |
| unnamed | gi 495133880 | 24.74 | 49.48 | 97  | 68  | 3  |
| unnamed | gi 517951930 | 26.51 | 59.04 | 83  | 56  | 3  |
| unnamed | gi 297584950 | 25.55 | 48.18 | 137 | 96  | 4  |
| unnamed | gi 498018280 | 22.59 | 42.26 | 239 | 149 | 9  |
| unnamed | gi 568803070 | 25.34 | 42.08 | 221 | 132 | 9  |
| unnamed | gi 170760830 | 25.87 | 42.79 | 201 | 130 | 8  |
| unnamed | gi 517597280 | 26.77 | 39.9  | 198 | 118 | 8  |
| unnamed | gi 497281680 | 22.18 | 43.93 | 239 | 157 | 9  |
| unnamed | gi 544868420 | 28.79 | 60.61 | 66  | 46  | 1  |
| unnamed | gi 493023290 | 26.44 | 39.42 | 208 | 126 | 8  |
| unnamed | gi 517500310 | 33.09 | 49.64 | 139 | 75  | 6  |
| unnamed | gi 489378950 | 24.87 | 41.12 | 197 | 123 | 6  |
| unnamed | gi 516360490 | 25.13 | 44.39 | 187 | 122 | 6  |
| unnamed | gi 226948670 | 27.27 | 40.11 | 187 | 118 | 6  |
| unnamed | gi 489620850 | 25.26 | 52.63 | 95  | 66  | 3  |
| unnamed | gi 487946140 | 23.86 | 41.62 | 197 | 125 | 6  |

|         |              |       |       |     |     |    |
|---------|--------------|-------|-------|-----|-----|----|
| unnamed | gi 48929407! | 26.77 | 39.9  | 198 | 118 | 8  |
| unnamed | gi 50704067! | 26.77 | 39.9  | 198 | 118 | 8  |
| unnamed | gi 487955320 | 32.04 | 45.63 | 103 | 60  | 3  |
| unnamed | gi 55978040: | 25.74 | 42.57 | 202 | 129 | 8  |
| unnamed | gi 57356127! | 22.59 | 43.51 | 239 | 156 | 9  |
| unnamed | gi 31063965: | 28.3  | 44.34 | 106 | 64  | 3  |
| unnamed | gi 48956878: | 25.81 | 45.16 | 186 | 120 | 8  |
| unnamed | gi 21890006: | 25.2  | 40.65 | 246 | 155 | 9  |
| unnamed | gi 26140431: | 22.59 | 43.51 | 239 | 156 | 9  |
| unnamed | gi 516286610 | 27.71 | 54.22 | 83  | 57  | 2  |
| unnamed | gi 26140505: | 25.14 | 41.9  | 179 | 114 | 7  |
| unnamed | gi 15395430! | 27.5  | 55    | 80  | 52  | 2  |
| unnamed | gi 15394078! | 26.2  | 42.78 | 187 | 120 | 7  |
| unnamed | gi 55863641! | 22.18 | 41    | 239 | 155 | 8  |
| unnamed | gi 43585383! | 24.21 | 42.63 | 190 | 121 | 6  |
| unnamed | gi 54470297: | 25.37 | 42.79 | 201 | 131 | 8  |
| unnamed | gi 48865877: | 25.26 | 51.58 | 95  | 66  | 3  |
| unnamed | gi 30567654: | 22.59 | 42.68 | 239 | 149 | 9  |
| unnamed | gi 38790056: | 20.58 | 42.39 | 243 | 164 | 8  |
| unnamed | gi 386713350 | 20.21 | 44.68 | 188 | 122 | 6  |
| unnamed | gi 50707784: | 32.43 | 56.76 | 74  | 48  | 2  |
| unnamed | gi 49953276! | 26.51 | 53.01 | 83  | 49  | 2  |
| unnamed | gi 57355284! | 26.51 | 54.22 | 83  | 58  | 2  |
| unnamed | gi 48862794! | 25.26 | 51.58 | 95  | 66  | 3  |
| unnamed | gi 547189460 | 28.18 | 47.27 | 110 | 66  | 3  |
| unnamed | gi 18793379: | 37.14 | 52.86 | 70  | 39  | 3  |
| unnamed | gi 54779005! | 25.26 | 50.53 | 95  | 66  | 3  |
| unnamed | gi 48953017! | 24.66 | 45.29 | 223 | 131 | 11 |
| unnamed | gi 54969975! | 20.76 | 42.8  | 236 | 158 | 8  |
| unnamed | gi 48863581! | 25.26 | 52.63 | 95  | 66  | 3  |
| unnamed | gi 488638300 | 25.26 | 51.58 | 95  | 66  | 3  |
| unnamed | gi 51592254! | 37.14 | 52.86 | 70  | 39  | 3  |
| unnamed | gi 49467020! | 24.04 | 42.08 | 183 | 121 | 6  |
| unnamed | gi 48877679! | 36.54 | 57.69 | 52  | 31  | 1  |
| unnamed | gi 27196223: | 20.38 | 44.59 | 157 | 106 | 6  |
| unnamed | gi 54513335: | 20.76 | 42.8  | 236 | 158 | 8  |
| unnamed | gi 38426742: | 20.76 | 42.8  | 236 | 158 | 8  |
| unnamed | gi 374321530 | 22.99 | 42.25 | 187 | 127 | 6  |
| unnamed | gi 49361667! | 23.85 | 48.46 | 130 | 92  | 4  |
| unnamed | gi 54787075! | 21.46 | 41.95 | 205 | 138 | 5  |
| unnamed | gi 14837937! | 25.37 | 42.79 | 201 | 131 | 8  |

|         |              |       |       |     |     |    |
|---------|--------------|-------|-------|-----|-----|----|
| unnamed | gi 515997289 | 42.22 | 55.56 | 45  | 25  | 1  |
| unnamed | gi 489328934 | 22.18 | 41.84 | 239 | 150 | 9  |
| unnamed | gi 518515588 | 42.22 | 55.56 | 45  | 25  | 1  |
| unnamed | gi 595631638 | 42.22 | 55.56 | 45  | 25  | 1  |
| unnamed | gi 507078207 | 24.14 | 47.13 | 87  | 63  | 1  |
| unnamed | gi 515988008 | 20.76 | 42.8  | 236 | 158 | 8  |
| unnamed | gi 515504206 | 20.94 | 41.88 | 234 | 160 | 8  |
| unnamed | gi 386738788 | 31.07 | 46.6  | 103 | 61  | 3  |
| unnamed | gi 589400827 | 26.74 | 55.81 | 86  | 58  | 3  |
| unnamed | gi 518089680 | 23.46 | 39.92 | 243 | 152 | 11 |
| unnamed | gi 550549519 | 23.93 | 44.17 | 163 | 113 | 4  |
| unnamed | gi 549309973 | 24.66 | 44.84 | 223 | 131 | 11 |
| unnamed | gi 260685107 | 24.66 | 44.84 | 223 | 131 | 11 |
| unnamed | gi 497280753 | 25.14 | 41.34 | 179 | 114 | 7  |
| unnamed | gi 516362687 | 27.5  | 55    | 80  | 52  | 2  |
| unnamed | gi 547235249 | 28.46 | 43.9  | 123 | 75  | 3  |
| unnamed | gi 545027476 | 24.66 | 44.84 | 223 | 131 | 11 |
| unnamed | gi 488637680 | 30.67 | 57.33 | 75  | 44  | 4  |
| unnamed | gi 489582224 | 25.26 | 40.53 | 190 | 124 | 6  |
| unnamed | gi 544988426 | 23.48 | 42.61 | 230 | 137 | 9  |
| unnamed | gi 429507190 | 20.34 | 42.8  | 236 | 159 | 8  |
| unnamed | gi 585386197 | 27.5  | 45.62 | 160 | 94  | 6  |
| unnamed | gi 597504678 | 20.34 | 42.8  | 236 | 159 | 8  |
| unnamed | gi 585392324 | 27.27 | 45.45 | 165 | 98  | 6  |
| unnamed | gi 517425547 | 32.43 | 58.11 | 74  | 38  | 4  |
| unnamed | gi 517763098 | 26.42 | 44.56 | 193 | 120 | 10 |
| unnamed | gi 488669410 | 31.58 | 46.05 | 76  | 34  | 2  |
| unnamed | gi 497713297 | 27.63 | 50    | 76  | 49  | 1  |
| unnamed | gi 407475206 | 50    | 73.33 | 30  | 15  | 0  |
| unnamed | gi 547472306 | 25.79 | 44.03 | 159 | 102 | 6  |
| unnamed | gi 375364327 | 20.68 | 43.04 | 237 | 157 | 9  |
| unnamed | gi 488671567 | 26.32 | 51.58 | 95  | 65  | 3  |
| unnamed | gi 565990129 | 30.77 | 44.87 | 78  | 41  | 2  |
| unnamed | gi 489525127 | 34.78 | 50    | 92  | 54  | 3  |
| unnamed | gi 488662688 | 30.67 | 56    | 75  | 44  | 4  |
| unnamed | gi 545050343 | 24.22 | 44.84 | 223 | 132 | 11 |
| unnamed | gi 546802313 | 25.58 | 52.33 | 86  | 59  | 3  |
| unnamed | gi 513041249 | 22.3  | 46.04 | 139 | 98  | 3  |
| unnamed | gi 495954157 | 36.17 | 59.57 | 47  | 29  | 1  |
| unnamed | gi 493325504 | 30.99 | 47.18 | 142 | 70  | 7  |
| unnamed | gi 494120037 | 23.58 | 39.62 | 212 | 109 | 8  |

|         |             |       |       |     |     |    |
|---------|-------------|-------|-------|-----|-----|----|
| unnamed | gi 54495816 | 24.22 | 44.84 | 223 | 132 | 11 |
| unnamed | gi 54504372 | 24.22 | 44.84 | 223 | 132 | 11 |
| unnamed | gi 51890670 | 26.64 | 42.52 | 214 | 120 | 9  |
| unnamed | gi 51593795 | 28.57 | 53.33 | 105 | 65  | 4  |

q. start, q. end, s. start, s. end, evalue, bit score

|   |     |   |     |           |     |
|---|-----|---|-----|-----------|-----|
| 1 | 285 | 1 | 285 | 0         | 576 |
| 1 | 285 | 1 | 285 | 0         | 575 |
| 1 | 285 | 1 | 285 | 0         | 569 |
| 1 | 285 | 1 | 285 | 0         | 567 |
| 1 | 285 | 1 | 285 | 0         | 566 |
| 1 | 285 | 1 | 285 | 0         | 565 |
| 1 | 285 | 1 | 285 | 0         | 563 |
| 1 | 285 | 1 | 285 | 0         | 563 |
| 1 | 285 | 1 | 285 | 0         | 561 |
| 1 | 285 | 1 | 285 | 0         | 556 |
| 1 | 285 | 1 | 285 | 0         | 555 |
| 1 | 285 | 1 | 285 | 0         | 552 |
| 1 | 285 | 1 | 285 | 0         | 550 |
| 1 | 285 | 1 | 285 | 0         | 546 |
| 1 | 285 | 1 | 285 | 0         | 542 |
| 1 | 285 | 1 | 286 | 1.00E-170 | 485 |
| 1 | 285 | 1 | 286 | 3.00E-170 | 484 |
| 1 | 285 | 1 | 286 | 6.00E-170 | 484 |
| 1 | 285 | 1 | 286 | 8.00E-170 | 483 |
| 1 | 285 | 1 | 286 | 1.00E-169 | 483 |
| 1 | 285 | 1 | 286 | 1.00E-169 | 483 |
| 1 | 285 | 1 | 286 | 1.00E-169 | 483 |
| 1 | 285 | 1 | 286 | 2.00E-169 | 483 |
| 1 | 285 | 1 | 286 | 2.00E-169 | 482 |
| 1 | 285 | 1 | 286 | 4.00E-169 | 481 |
| 1 | 285 | 1 | 286 | 6.00E-169 | 481 |
| 1 | 285 | 1 | 286 | 3.00E-168 | 479 |
| 1 | 285 | 1 | 285 | 3.00E-160 | 459 |
| 1 | 285 | 1 | 285 | 8.00E-160 | 458 |
| 1 | 285 | 1 | 286 | 2.00E-158 | 454 |
| 1 | 285 | 1 | 286 | 2.00E-149 | 431 |
| 1 | 285 | 1 | 286 | 6.00E-149 | 430 |
| 1 | 285 | 1 | 286 | 3.00E-147 | 426 |



|   |     |   |     |           |     |
|---|-----|---|-----|-----------|-----|
| 1 | 285 | 1 | 286 | 4.00E-147 | 426 |
| 1 | 285 | 1 | 287 | 5.00E-107 | 324 |
| 1 | 285 | 1 | 287 | 9.00E-107 | 323 |
| 1 | 285 | 1 | 287 | 9.00E-106 | 320 |
| 1 | 285 | 1 | 287 | 4.00E-105 | 319 |
| 1 | 285 | 1 | 285 | 1.00E-102 | 313 |
| 1 | 285 | 1 | 285 | 2.00E-102 | 312 |
| 1 | 285 | 1 | 285 | 3.00E-102 | 311 |
| 1 | 285 | 1 | 285 | 1.00E-101 | 310 |
| 1 | 285 | 1 | 285 | 1.00E-101 | 310 |
| 1 | 285 | 1 | 285 | 2.00E-101 | 310 |
| 1 | 285 | 1 | 285 | 3.00E-101 | 309 |
| 1 | 285 | 1 | 284 | 2.00E-99  | 304 |
| 1 | 285 | 1 | 294 | 4.00E-90  | 281 |
| 1 | 285 | 1 | 293 | 1.00E-84  | 266 |
| 1 | 285 | 1 | 295 | 2.00E-84  | 266 |
| 1 | 285 | 1 | 296 | 7.00E-84  | 265 |
| 1 | 285 | 3 | 294 | 1.00E-83  | 264 |
| 1 | 285 | 1 | 297 | 2.00E-83  | 264 |
| 1 | 285 | 1 | 293 | 4.00E-83  | 263 |
| 2 | 285 | 3 | 292 | 6.00E-83  | 263 |
| 1 | 285 | 1 | 295 | 1.00E-82  | 262 |
| 1 | 285 | 1 | 293 | 2.00E-82  | 261 |
| 1 | 285 | 1 | 290 | 5.00E-82  | 260 |
| 2 | 285 | 3 | 300 | 1.00E-81  | 259 |
| 2 | 285 | 3 | 300 | 2.00E-81  | 259 |
| 1 | 285 | 1 | 301 | 9.00E-81  | 257 |
| 1 | 285 | 1 | 301 | 1.00E-80  | 257 |
| 1 | 162 | 1 | 162 | 2.00E-80  | 251 |
| 1 | 285 | 1 | 293 | 3.00E-80  | 256 |
| 5 | 285 | 4 | 289 | 4.00E-80  | 255 |
| 1 | 285 | 1 | 298 | 1.00E-79  | 254 |
| 1 | 285 | 1 | 287 | 1.00E-79  | 253 |
| 1 | 285 | 1 | 295 | 5.00E-79  | 252 |
| 2 | 285 | 3 | 295 | 1.00E-78  | 251 |
| 1 | 285 | 1 | 289 | 5.00E-78  | 249 |
| 1 | 285 | 1 | 293 | 1.00E-77  | 249 |
| 2 | 285 | 3 | 300 | 2.00E-77  | 249 |
| 2 | 285 | 3 | 300 | 3.00E-77  | 248 |
| 1 | 285 | 1 | 296 | 2.00E-76  | 246 |
| 2 | 285 | 3 | 301 | 8.00E-76  | 244 |

|    |     |    |     |          |     |
|----|-----|----|-----|----------|-----|
| 2  | 285 | 3  | 300 | 1.00E-75 | 244 |
| 3  | 285 | 2  | 290 | 1.00E-75 | 243 |
| 3  | 285 | 2  | 288 | 2.00E-75 | 243 |
| 11 | 285 | 11 | 296 | 8.00E-75 | 242 |
| 1  | 285 | 1  | 296 | 1.00E-74 | 241 |
| 5  | 285 | 6  | 302 | 7.00E-74 | 239 |
| 5  | 285 | 11 | 307 | 8.00E-74 | 239 |
| 1  | 285 | 1  | 295 | 1.00E-73 | 238 |
| 25 | 285 | 1  | 268 | 5.00E-73 | 236 |
| 1  | 285 | 1  | 295 | 8.00E-73 | 236 |
| 1  | 285 | 6  | 301 | 1.00E-72 | 236 |
| 1  | 285 | 1  | 290 | 5.00E-72 | 234 |
| 6  | 285 | 16 | 307 | 1.00E-71 | 234 |
| 1  | 285 | 2  | 286 | 2.00E-71 | 233 |
| 1  | 285 | 2  | 286 | 3.00E-71 | 232 |
| 1  | 285 | 1  | 295 | 3.00E-71 | 233 |
| 2  | 285 | 8  | 302 | 8.00E-71 | 231 |
| 1  | 285 | 1  | 290 | 2.00E-70 | 230 |
| 3  | 285 | 5  | 291 | 5.00E-70 | 229 |
| 2  | 285 | 3  | 301 | 1.00E-69 | 229 |
| 2  | 285 | 3  | 301 | 1.00E-69 | 228 |
| 1  | 285 | 1  | 300 | 2.00E-69 | 228 |
| 2  | 285 | 3  | 301 | 2.00E-69 | 228 |
| 1  | 285 | 1  | 284 | 3.00E-69 | 227 |
| 5  | 285 | 1  | 289 | 3.00E-69 | 227 |
| 2  | 285 | 3  | 301 | 2.00E-67 | 223 |
| 4  | 285 | 3  | 296 | 4.00E-67 | 222 |
| 1  | 285 | 1  | 297 | 5.00E-67 | 222 |
| 10 | 278 | 12 | 285 | 5.00E-66 | 219 |
| 1  | 285 | 1  | 283 | 1.00E-65 | 218 |
| 4  | 277 | 6  | 289 | 1.00E-64 | 215 |
| 4  | 278 | 6  | 284 | 7.00E-64 | 213 |
| 10 | 278 | 12 | 285 | 7.00E-64 | 213 |
| 70 | 285 | 1  | 222 | 2.00E-63 | 209 |
| 3  | 284 | 2  | 288 | 4.00E-63 | 211 |
| 4  | 277 | 6  | 289 | 3.00E-62 | 209 |
| 4  | 277 | 6  | 289 | 3.00E-62 | 209 |
| 4  | 277 | 6  | 289 | 3.00E-62 | 209 |
| 5  | 285 | 1  | 282 | 3.00E-62 | 209 |
| 4  | 277 | 6  | 289 | 3.00E-62 | 209 |
| 4  | 277 | 6  | 289 | 4.00E-62 | 209 |



|    |     |    |     |          |     |
|----|-----|----|-----|----------|-----|
| 5  | 285 | 9  | 294 | 9.00E-49 | 174 |
| 5  | 285 | 9  | 294 | 9.00E-49 | 174 |
| 17 | 285 | 1  | 274 | 3.00E-48 | 172 |
| 5  | 285 | 9  | 294 | 4.00E-48 | 172 |
| 5  | 285 | 9  | 294 | 5.00E-48 | 172 |
| 46 | 277 | 15 | 249 | 2.00E-47 | 169 |
| 5  | 285 | 9  | 294 | 2.00E-47 | 170 |
| 2  | 278 | 3  | 295 | 7.00E-47 | 169 |
| 5  | 285 | 8  | 296 | 3.00E-46 | 167 |
| 46 | 277 | 15 | 250 | 5.00E-46 | 166 |
| 46 | 277 | 15 | 250 | 7.00E-46 | 165 |
| 46 | 277 | 15 | 250 | 2.00E-45 | 164 |
| 3  | 277 | 12 | 295 | 2.00E-45 | 165 |
| 46 | 277 | 15 | 250 | 2.00E-45 | 164 |
| 46 | 277 | 15 | 250 | 3.00E-45 | 164 |
| 46 | 277 | 15 | 250 | 2.00E-44 | 162 |
| 46 | 277 | 15 | 250 | 3.00E-44 | 161 |
| 1  | 270 | 28 | 333 | 5.00E-44 | 163 |
| 5  | 284 | 8  | 297 | 5.00E-44 | 162 |
| 1  | 270 | 28 | 333 | 6.00E-44 | 163 |
| 4  | 278 | 5  | 288 | 6.00E-44 | 161 |
| 26 | 284 | 36 | 293 | 7.00E-44 | 161 |
| 2  | 285 | 3  | 314 | 7.00E-44 | 162 |
| 5  | 277 | 1  | 282 | 8.00E-44 | 161 |
| 46 | 277 | 15 | 250 | 9.00E-44 | 160 |
| 5  | 285 | 9  | 294 | 1.00E-43 | 161 |
| 5  | 284 | 8  | 297 | 1.00E-43 | 161 |
| 5  | 284 | 8  | 297 | 1.00E-43 | 160 |
| 46 | 277 | 15 | 250 | 2.00E-43 | 159 |
| 5  | 277 | 9  | 288 | 2.00E-43 | 160 |
| 5  | 284 | 8  | 297 | 2.00E-43 | 160 |
| 46 | 277 | 15 | 250 | 2.00E-43 | 159 |
| 5  | 284 | 8  | 297 | 2.00E-43 | 160 |
| 46 | 277 | 15 | 250 | 2.00E-43 | 159 |
| 5  | 284 | 8  | 297 | 2.00E-43 | 160 |
| 46 | 277 | 15 | 250 | 3.00E-43 | 159 |
| 46 | 277 | 15 | 250 | 3.00E-43 | 159 |
| 5  | 284 | 8  | 297 | 3.00E-43 | 160 |
| 5  | 284 | 8  | 297 | 5.00E-43 | 159 |
| 46 | 277 | 15 | 250 | 5.00E-43 | 158 |
| 46 | 277 | 15 | 250 | 6.00E-43 | 157 |

|    |     |    |     |          |     |
|----|-----|----|-----|----------|-----|
| 46 | 277 | 15 | 250 | 1.00E-42 | 157 |
| 3  | 277 | 10 | 295 | 1.00E-42 | 158 |
| 5  | 284 | 8  | 297 | 1.00E-42 | 158 |
| 46 | 277 | 15 | 250 | 1.00E-42 | 157 |
| 25 | 284 | 31 | 285 | 1.00E-42 | 157 |
| 94 | 277 | 16 | 203 | 2.00E-42 | 155 |
| 3  | 284 | 6  | 295 | 2.00E-42 | 157 |
| 4  | 278 | 3  | 313 | 3.00E-42 | 157 |
| 46 | 277 | 15 | 250 | 5.00E-42 | 155 |
| 3  | 284 | 6  | 295 | 6.00E-42 | 156 |
| 34 | 284 | 45 | 297 | 9.00E-42 | 156 |
| 25 | 284 | 31 | 285 | 9.00E-42 | 155 |
| 34 | 284 | 45 | 297 | 1.00E-41 | 155 |
| 25 | 284 | 31 | 285 | 1.00E-41 | 155 |
| 34 | 284 | 45 | 297 | 2.00E-41 | 155 |
| 25 | 284 | 24 | 278 | 2.00E-41 | 154 |
| 23 | 284 | 33 | 297 | 2.00E-41 | 155 |
| 34 | 284 | 45 | 297 | 2.00E-41 | 155 |
| 34 | 284 | 45 | 297 | 2.00E-41 | 155 |
| 34 | 284 | 45 | 297 | 2.00E-41 | 155 |
| 34 | 284 | 45 | 297 | 3.00E-41 | 154 |
| 46 | 277 | 15 | 250 | 3.00E-41 | 153 |
| 34 | 284 | 45 | 297 | 3.00E-41 | 154 |
| 34 | 284 | 45 | 297 | 3.00E-41 | 154 |
| 46 | 277 | 15 | 250 | 7.00E-41 | 152 |
| 34 | 284 | 45 | 297 | 7.00E-41 | 154 |
| 34 | 284 | 45 | 297 | 9.00E-41 | 153 |
| 34 | 284 | 45 | 297 | 1.00E-40 | 153 |
| 5  | 285 | 6  | 300 | 2.00E-40 | 152 |
| 5  | 270 | 12 | 280 | 2.00E-40 | 152 |
| 2  | 277 | 6  | 290 | 3.00E-40 | 152 |
| 2  | 277 | 6  | 290 | 5.00E-40 | 151 |
| 2  | 277 | 6  | 290 | 8.00E-40 | 150 |
| 5  | 273 | 12 | 283 | 8.00E-40 | 150 |
| 1  | 278 | 1  | 305 | 1.00E-39 | 150 |
| 3  | 277 | 4  | 282 | 1.00E-39 | 150 |
| 2  | 277 | 6  | 290 | 2.00E-39 | 150 |
| 5  | 277 | 1  | 282 | 2.00E-39 | 149 |
| 2  | 273 | 6  | 286 | 2.00E-39 | 149 |
| 2  | 273 | 6  | 286 | 2.00E-39 | 149 |
| 2  | 273 | 6  | 286 | 2.00E-39 | 149 |

|     |     |    |     |          |     |
|-----|-----|----|-----|----------|-----|
| 2   | 277 | 6  | 290 | 3.00E-39 | 149 |
| 5   | 285 | 3  | 272 | 4.00E-39 | 148 |
| 96  | 277 | 3  | 188 | 5.00E-39 | 145 |
| 3   | 284 | 6  | 294 | 6.00E-39 | 148 |
| 206 | 285 | 1  | 80  | 8.00E-39 | 141 |
| 3   | 284 | 6  | 294 | 9.00E-39 | 148 |
| 46  | 285 | 55 | 296 | 1.00E-38 | 147 |
| 3   | 284 | 6  | 287 | 3.00E-38 | 146 |
| 3   | 278 | 4  | 295 | 9.00E-38 | 145 |
| 1   | 278 | 1  | 317 | 2.00E-37 | 145 |
| 4   | 273 | 8  | 286 | 6.00E-37 | 143 |
| 31  | 278 | 43 | 282 | 4.00E-36 | 140 |
| 2   | 269 | 6  | 280 | 7.00E-36 | 140 |
| 3   | 284 | 6  | 287 | 8.00E-36 | 140 |
| 1   | 269 | 1  | 278 | 9.00E-36 | 140 |
| 67  | 278 | 1  | 224 | 1.00E-35 | 138 |
| 5   | 285 | 3  | 272 | 4.00E-35 | 137 |
| 127 | 277 | 2  | 153 | 4.00E-35 | 134 |
| 1   | 278 | 1  | 287 | 5.00E-35 | 138 |
| 7   | 278 | 8  | 301 | 5.00E-35 | 138 |
| 1   | 277 | 21 | 312 | 6.00E-35 | 138 |
| 7   | 278 | 8  | 301 | 9.00E-35 | 137 |
| 7   | 278 | 8  | 301 | 9.00E-35 | 137 |
| 1   | 285 | 1  | 310 | 2.00E-34 | 136 |
| 58  | 270 | 71 | 276 | 3.00E-34 | 135 |
| 4   | 277 | 16 | 294 | 1.00E-33 | 134 |
| 4   | 269 | 3  | 280 | 2.00E-33 | 133 |
| 50  | 277 | 54 | 297 | 6.00E-33 | 132 |
| 91  | 276 | 5  | 191 | 1.00E-32 | 129 |
| 39  | 278 | 7  | 253 | 3.00E-32 | 129 |
| 3   | 281 | 2  | 290 | 4.00E-32 | 130 |
| 2   | 278 | 4  | 284 | 1.00E-31 | 129 |
| 3   | 278 | 18 | 334 | 3.00E-31 | 129 |
| 43  | 277 | 25 | 273 | 7.00E-31 | 126 |
| 35  | 279 | 33 | 272 | 2.00E-30 | 125 |
| 2   | 278 | 3  | 291 | 5.00E-30 | 124 |
| 46  | 273 | 50 | 281 | 1.00E-29 | 123 |
| 29  | 273 | 26 | 281 | 2.00E-29 | 123 |
| 52  | 275 | 75 | 313 | 2.00E-29 | 123 |
| 1   | 281 | 4  | 290 | 3.00E-29 | 122 |
| 3   | 278 | 5  | 326 | 5.00E-29 | 122 |

|     |     |     |     |          |     |
|-----|-----|-----|-----|----------|-----|
| 1   | 270 | 1   | 283 | 8.00E-29 | 121 |
| 56  | 278 | 94  | 317 | 3.00E-28 | 120 |
| 45  | 277 | 45  | 286 | 7.00E-28 | 119 |
| 45  | 277 | 45  | 286 | 7.00E-28 | 118 |
| 45  | 277 | 45  | 286 | 7.00E-28 | 118 |
| 45  | 277 | 45  | 286 | 8.00E-28 | 118 |
| 9   | 269 | 13  | 306 | 9.00E-28 | 119 |
| 56  | 277 | 81  | 320 | 1.00E-27 | 119 |
| 29  | 280 | 40  | 282 | 1.00E-27 | 118 |
| 4   | 269 | 6   | 284 | 2.00E-27 | 117 |
| 45  | 277 | 45  | 286 | 2.00E-27 | 117 |
| 2   | 278 | 20  | 302 | 2.00E-27 | 117 |
| 3   | 281 | 2   | 290 | 3.00E-27 | 117 |
| 45  | 277 | 45  | 286 | 3.00E-27 | 116 |
| 4   | 269 | 3   | 295 | 3.00E-27 | 117 |
| 3   | 281 | 2   | 290 | 4.00E-27 | 116 |
| 3   | 281 | 2   | 290 | 4.00E-27 | 116 |
| 1   | 270 | 1   | 284 | 5.00E-27 | 116 |
| 1   | 269 | 6   | 317 | 5.00E-27 | 117 |
| 12  | 269 | 11  | 306 | 6.00E-27 | 116 |
| 58  | 278 | 67  | 297 | 6.00E-27 | 116 |
| 2   | 277 | 5   | 312 | 7.00E-27 | 116 |
| 4   | 269 | 3   | 293 | 8.00E-27 | 115 |
| 3   | 281 | 2   | 290 | 1.00E-26 | 115 |
| 12  | 269 | 11  | 316 | 1.00E-26 | 115 |
| 1   | 270 | 1   | 284 | 1.00E-26 | 115 |
| 9   | 269 | 13  | 306 | 2.00E-26 | 115 |
| 56  | 277 | 60  | 293 | 3.00E-26 | 114 |
| 3   | 281 | 2   | 290 | 4.00E-26 | 114 |
| 4   | 269 | 3   | 281 | 5.00E-26 | 113 |
| 45  | 277 | 45  | 286 | 5.00E-26 | 113 |
| 45  | 277 | 45  | 286 | 7.00E-26 | 113 |
| 191 | 278 | 1   | 90  | 8.00E-26 | 107 |
| 34  | 277 | 2   | 263 | 3.00E-25 | 111 |
| 126 | 274 | 79  | 224 | 3.00E-25 | 110 |
| 28  | 275 | 35  | 288 | 4.00E-25 | 110 |
| 28  | 275 | 35  | 288 | 1.00E-24 | 109 |
| 135 | 277 | 122 | 263 | 1.00E-24 | 109 |
| 141 | 274 | 90  | 224 | 1.00E-24 | 108 |
| 4   | 269 | 3   | 279 | 3.00E-24 | 108 |
| 4   | 269 | 3   | 279 | 3.00E-24 | 108 |

|    |     |     |     |          |      |
|----|-----|-----|-----|----------|------|
| 9  | 269 | 6   | 291 | 4.00E-24 | 108  |
| 9  | 269 | 5   | 290 | 4.00E-24 | 108  |
| 52 | 270 | 3   | 232 | 1.00E-23 | 105  |
| 4  | 269 | 3   | 296 | 1.00E-23 | 107  |
| 4  | 269 | 3   | 289 | 2.00E-23 | 106  |
| 51 | 269 | 23  | 258 | 2.00E-23 | 105  |
| 51 | 269 | 13  | 248 | 3.00E-23 | 105  |
| 62 | 271 | 41  | 255 | 3.00E-23 | 105  |
| 7  | 273 | 4   | 281 | 5.00E-23 | 105  |
| 4  | 269 | 3   | 293 | 7.00E-23 | 104  |
| 98 | 279 | 51  | 238 | 8.00E-23 | 103  |
| 72 | 277 | 1   | 218 | 2.00E-22 | 102  |
| 9  | 278 | 5   | 287 | 2.00E-22 | 103  |
| 67 | 269 | 1   | 222 | 6.00E-22 | 100  |
| 3  | 284 | 2   | 319 | 1.00E-21 | 102  |
| 3  | 284 | 2   | 319 | 1.00E-21 | 102  |
| 5  | 212 | 9   | 217 | 2.00E-21 | 99.4 |
| 5  | 269 | 4   | 279 | 7.00E-21 | 99   |
| 4  | 269 | 3   | 291 | 6.00E-20 | 96.3 |
| 4  | 269 | 3   | 291 | 1.00E-19 | 95.5 |
| 22 | 211 | 21  | 220 | 2.00E-19 | 94   |
| 4  | 269 | 3   | 291 | 5.00E-19 | 93.6 |
| 33 | 269 | 37  | 295 | 1.00E-18 | 92.4 |
| 44 | 273 | 49  | 318 | 1.00E-18 | 92.4 |
| 46 | 269 | 53  | 289 | 3.00E-18 | 91.3 |
| 15 | 270 | 26  | 288 | 3.00E-18 | 91.3 |
| 46 | 273 | 52  | 315 | 4.00E-18 | 91.3 |
| 44 | 273 | 49  | 318 | 5.00E-18 | 90.9 |
| 85 | 269 | 33  | 227 | 8.00E-18 | 89.4 |
| 1  | 269 | 6   | 306 | 2.00E-17 | 89.4 |
| 1  | 269 | 6   | 306 | 3.00E-17 | 88.6 |
| 34 | 274 | 43  | 293 | 5.00E-17 | 87.8 |
| 4  | 128 | 6   | 133 | 7.00E-17 | 84.7 |
| 24 | 270 | 17  | 293 | 4.00E-16 | 85.1 |
| 5  | 269 | 4   | 279 | 1.00E-15 | 83.6 |
| 3  | 269 | 2   | 308 | 2.00E-15 | 85.1 |
| 51 | 269 | 114 | 353 | 2.00E-15 | 84   |
| 3  | 269 | 2   | 308 | 2.00E-15 | 84.3 |
| 51 | 269 | 114 | 353 | 2.00E-15 | 83.6 |
| 49 | 271 | 14  | 231 | 5.00E-14 | 78.2 |
| 58 | 269 | 82  | 305 | 1.00E-13 | 78.2 |



|     |     |     |     |          |      |
|-----|-----|-----|-----|----------|------|
| 96  | 277 | 32  | 228 | 2.00E-13 | 76.6 |
| 93  | 278 | 18  | 192 | 2.00E-13 | 76.3 |
| 58  | 269 | 82  | 305 | 4.00E-13 | 77   |
| 95  | 277 | 118 | 318 | 5.00E-13 | 76.6 |
| 5   | 269 | 12  | 284 | 9.00E-13 | 75.5 |
| 58  | 269 | 82  | 305 | 2.00E-12 | 76.3 |
| 67  | 269 | 1   | 227 | 2.00E-12 | 73.9 |
| 5   | 269 | 4   | 278 | 5.00E-12 | 73.2 |
| 43  | 270 | 8   | 231 | 5.00E-12 | 72.8 |
| 87  | 269 | 14  | 186 | 5.00E-12 | 72   |
| 43  | 270 | 8   | 231 | 6.00E-12 | 72.4 |
| 43  | 278 | 16  | 252 | 9.00E-12 | 73.9 |
| 1   | 179 | 1   | 182 | 3.00E-11 | 71.6 |
| 53  | 275 | 16  | 231 | 5.00E-11 | 69.7 |
| 35  | 266 | 3   | 243 | 1.00E-10 | 68.9 |
| 99  | 269 | 25  | 184 | 4.00E-10 | 67   |
| 99  | 269 | 25  | 184 | 4.00E-10 | 66.6 |
| 96  | 278 | 22  | 193 | 7.00E-10 | 65.9 |
| 99  | 269 | 25  | 184 | 8.00E-10 | 65.9 |
| 99  | 269 | 25  | 184 | 8.00E-10 | 65.9 |
| 43  | 270 | 8   | 231 | 8.00E-10 | 66.6 |
| 96  | 278 | 22  | 193 | 1.00E-09 | 65.1 |
| 85  | 278 | 635 | 819 | 2.00E-09 | 67.4 |
| 80  | 278 | 154 | 359 | 2.00E-09 | 66.6 |
| 99  | 269 | 27  | 186 | 3.00E-09 | 64.3 |
| 99  | 269 | 27  | 186 | 3.00E-09 | 64.3 |
| 99  | 269 | 25  | 184 | 4.00E-09 | 63.9 |
| 83  | 276 | 36  | 233 | 4.00E-09 | 64.3 |
| 36  | 270 | 8   | 244 | 5.00E-09 | 64.3 |
| 83  | 275 | 11  | 207 | 5.00E-09 | 63.9 |
| 83  | 275 | 45  | 241 | 6.00E-09 | 64.3 |
| 13  | 269 | 4   | 268 | 6.00E-09 | 64.7 |
| 43  | 278 | 8   | 253 | 6.00E-09 | 64.3 |
| 43  | 278 | 10  | 255 | 7.00E-09 | 64.3 |
| 155 | 269 | 106 | 216 | 7.00E-09 | 63.5 |
| 85  | 277 | 10  | 189 | 7.00E-09 | 63.2 |
| 155 | 269 | 106 | 216 | 8.00E-09 | 63.2 |
| 84  | 280 | 155 | 342 | 1.00E-08 | 64.7 |
| 36  | 270 | 3   | 239 | 1.00E-08 | 63.2 |
| 85  | 278 | 508 | 692 | 2.00E-08 | 64.3 |
| 85  | 278 | 15  | 191 | 2.00E-08 | 62   |

|     |     |     |     |          |      |
|-----|-----|-----|-----|----------|------|
| 85  | 278 | 638 | 822 | 2.00E-08 | 64.3 |
| 96  | 269 | 22  | 184 | 2.00E-08 | 61.6 |
| 84  | 280 | 151 | 338 | 3.00E-08 | 63.2 |
| 83  | 274 | 54  | 251 | 3.00E-08 | 62.4 |
| 6   | 82  | 9   | 85  | 3.00E-08 | 63.2 |
| 43  | 278 | 6   | 240 | 3.00E-08 | 62   |
| 60  | 278 | 65  | 276 | 4.00E-08 | 62.4 |
| 60  | 278 | 63  | 274 | 4.00E-08 | 62.4 |
| 94  | 269 | 30  | 192 | 4.00E-08 | 61.2 |
| 60  | 278 | 45  | 256 | 4.00E-08 | 62   |
| 85  | 278 | 53  | 246 | 5.00E-08 | 62.4 |
| 103 | 270 | 215 | 356 | 5.00E-08 | 62.4 |
| 60  | 278 | 65  | 276 | 5.00E-08 | 62   |
| 43  | 278 | 6   | 240 | 5.00E-08 | 61.6 |
| 60  | 278 | 65  | 276 | 7.00E-08 | 61.6 |
| 60  | 278 | 65  | 276 | 7.00E-08 | 61.6 |
| 60  | 278 | 65  | 276 | 7.00E-08 | 61.6 |
| 60  | 278 | 65  | 276 | 8.00E-08 | 61.6 |
| 85  | 270 | 44  | 231 | 9.00E-08 | 60.8 |
| 60  | 278 | 65  | 276 | 1.00E-07 | 61.2 |
| 84  | 278 | 638 | 823 | 1.00E-07 | 62   |
| 84  | 278 | 638 | 823 | 1.00E-07 | 62   |
| 209 | 277 | 1   | 72  | 1.00E-07 | 57.4 |
| 106 | 285 | 274 | 448 | 2.00E-07 | 60.8 |
| 96  | 278 | 666 | 837 | 2.00E-07 | 61.2 |
| 9   | 98  | 4   | 93  | 2.00E-07 | 60.5 |
| 93  | 269 | 19  | 184 | 3.00E-07 | 58.9 |
| 95  | 270 | 68  | 245 | 3.00E-07 | 59.7 |
| 85  | 271 | 44  | 224 | 3.00E-07 | 58.9 |
| 106 | 285 | 274 | 448 | 3.00E-07 | 60.1 |
| 88  | 270 | 13  | 182 | 4.00E-07 | 58.5 |
| 85  | 274 | 44  | 235 | 4.00E-07 | 58.9 |
| 94  | 278 | 20  | 191 | 5.00E-07 | 58.2 |
| 1   | 194 | 1   | 194 | 5.00E-07 | 59.3 |
| 91  | 269 | 17  | 182 | 5.00E-07 | 57.8 |
| 140 | 270 | 107 | 231 | 6.00E-07 | 58.5 |
| 140 | 270 | 107 | 231 | 6.00E-07 | 58.5 |
| 135 | 270 | 118 | 231 | 6.00E-07 | 58.5 |
| 99  | 269 | 24  | 181 | 6.00E-07 | 57.8 |
| 95  | 270 | 54  | 231 | 9.00E-07 | 57.8 |
| 88  | 278 | 13  | 190 | 1.00E-06 | 57   |

|     |     |     |     |          |      |
|-----|-----|-----|-----|----------|------|
| 125 | 269 | 94  | 235 | 1.00E-06 | 57.8 |
| 85  | 270 | 506 | 682 | 1.00E-06 | 58.9 |
| 84  | 270 | 63  | 250 | 1.00E-06 | 57.8 |
| 95  | 270 | 53  | 227 | 2.00E-06 | 57   |
| 80  | 274 | 26  | 224 | 2.00E-06 | 57   |
| 99  | 270 | 67  | 239 | 2.00E-06 | 57.8 |
| 96  | 278 | 652 | 823 | 2.00E-06 | 58.2 |
| 91  | 269 | 17  | 182 | 2.00E-06 | 56.2 |
| 96  | 278 | 61  | 247 | 3.00E-06 | 56.6 |
| 99  | 269 | 24  | 181 | 3.00E-06 | 55.8 |
| 9   | 98  | 4   | 93  | 3.00E-06 | 56.6 |
| 145 | 278 | 147 | 276 | 4.00E-06 | 56.6 |
| 84  | 270 | 163 | 342 | 4.00E-06 | 57   |
| 81  | 270 | 29  | 211 | 4.00E-06 | 55.8 |
| 87  | 270 | 631 | 805 | 4.00E-06 | 57.4 |
| 9   | 100 | 4   | 95  | 4.00E-06 | 56.6 |
| 80  | 269 | 3   | 184 | 4.00E-06 | 55.5 |
| 115 | 277 | 5   | 155 | 4.00E-06 | 54.7 |
| 96  | 270 | 627 | 790 | 5.00E-06 | 57   |
| 96  | 277 | 72  | 255 | 5.00E-06 | 56.2 |
| 94  | 281 | 18  | 191 | 5.00E-06 | 55.1 |
| 94  | 278 | 20  | 192 | 5.00E-06 | 55.1 |
| 84  | 278 | 657 | 842 | 5.00E-06 | 57   |
| 9   | 269 | 8   | 296 | 7.00E-06 | 55.8 |
| 94  | 259 | 19  | 171 | 8.00E-06 | 54.7 |
| 36  | 278 | 567 | 805 | 8.00E-06 | 56.2 |
| 84  | 278 | 42  | 244 | 8.00E-06 | 55.5 |
| 72  | 279 | 21  | 231 | 9.00E-06 | 55.1 |
| 135 | 269 | 73  | 183 | 1.00E-05 | 54.3 |
| 1   | 82  | 1   | 89  | 1.00E-05 | 55.5 |
| 93  | 269 | 19  | 184 | 1.00E-05 | 54.3 |
| 87  | 278 | 631 | 813 | 1.00E-05 | 55.8 |
| 80  | 270 | 26  | 220 | 1.00E-05 | 54.7 |
| 96  | 281 | 68  | 257 | 1.00E-05 | 55.1 |
| 96  | 181 | 17  | 106 | 1.00E-05 | 52.4 |
| 96  | 270 | 14  | 176 | 1.00E-05 | 53.9 |
| 91  | 270 | 52  | 231 | 1.00E-05 | 54.3 |
| 83  | 270 | 377 | 553 | 2.00E-05 | 55.5 |
| 135 | 269 | 73  | 183 | 2.00E-05 | 53.5 |
| 9   | 82  | 4   | 77  | 2.00E-05 | 54.7 |
| 9   | 82  | 4   | 77  | 2.00E-05 | 54.7 |

|     |     |     |     |          |      |
|-----|-----|-----|-----|----------|------|
| 79  | 278 | 146 | 353 | 2.00E-05 | 55.1 |
| 94  | 270 | 19  | 182 | 2.00E-05 | 53.5 |
| 96  | 278 | 68  | 254 | 2.00E-05 | 54.3 |
| 83  | 270 | 174 | 354 | 2.00E-05 | 54.7 |
| 80  | 270 | 29  | 223 | 2.00E-05 | 53.9 |
| 9   | 82  | 4   | 77  | 2.00E-05 | 54.3 |
| 84  | 278 | 639 | 824 | 2.00E-05 | 55.1 |
| 84  | 277 | 51  | 245 | 2.00E-05 | 53.9 |
| 175 | 278 | 728 | 823 | 2.00E-05 | 55.1 |
| 9   | 98  | 4   | 94  | 3.00E-05 | 53.9 |
| 78  | 278 | 55  | 254 | 3.00E-05 | 53.9 |
| 144 | 278 | 34  | 163 | 3.00E-05 | 52.4 |
| 78  | 278 | 55  | 254 | 3.00E-05 | 53.9 |
| 46  | 284 | 12  | 245 | 3.00E-05 | 53.5 |
| 72  | 279 | 21  | 231 | 4.00E-05 | 53.1 |
| 9   | 94  | 4   | 89  | 4.00E-05 | 53.5 |
| 87  | 278 | 631 | 813 | 4.00E-05 | 54.3 |
| 142 | 282 | 5   | 138 | 4.00E-05 | 51.2 |
| 68  | 269 | 44  | 238 | 5.00E-05 | 53.5 |
| 87  | 270 | 643 | 817 | 5.00E-05 | 53.9 |
| 186 | 278 | 174 | 258 | 5.00E-05 | 53.1 |
| 87  | 270 | 631 | 805 | 5.00E-05 | 53.9 |
| 84  | 278 | 639 | 824 | 6.00E-05 | 53.9 |
| 87  | 270 | 616 | 790 | 6.00E-05 | 53.9 |
| 85  | 270 | 505 | 681 | 6.00E-05 | 53.5 |
| 80  | 270 | 26  | 220 | 6.00E-05 | 52.4 |
| 63  | 270 | 90  | 295 | 7.00E-05 | 52.8 |
| 72  | 279 | 21  | 231 | 8.00E-05 | 52.4 |
| 85  | 270 | 505 | 681 | 8.00E-05 | 53.1 |
| 83  | 270 | 177 | 368 | 8.00E-05 | 52.8 |
| 83  | 270 | 168 | 359 | 8.00E-05 | 52.8 |
| 95  | 269 | 21  | 182 | 8.00E-05 | 51.6 |
| 94  | 269 | 27  | 183 | 9.00E-05 | 51.6 |
| 80  | 270 | 29  | 223 | 9.00E-05 | 52   |
| 9   | 82  | 4   | 77  | 9.00E-05 | 52.4 |
| 83  | 270 | 168 | 359 | 9.00E-05 | 52.8 |
| 72  | 279 | 21  | 231 | 1.00E-04 | 52   |
| 106 | 285 | 276 | 451 | 1.00E-04 | 52.8 |
| 83  | 279 | 10  | 195 | 1.00E-04 | 51.6 |
| 96  | 269 | 22  | 184 | 1.00E-04 | 51.2 |
| 85  | 270 | 505 | 681 | 1.00E-04 | 52.8 |

|     |     |     |     |          |      |
|-----|-----|-----|-----|----------|------|
| 87  | 270 | 631 | 805 | 1.00E-04 | 52.8 |
| 46  | 284 | 12  | 245 | 1.00E-04 | 51.6 |
| 46  | 278 | 11  | 238 | 1.00E-04 | 52.4 |
| 87  | 270 | 631 | 805 | 1.00E-04 | 52.8 |
| 72  | 279 | 21  | 231 | 1.00E-04 | 51.6 |
| 87  | 270 | 631 | 805 | 1.00E-04 | 52.4 |
| 96  | 270 | 663 | 826 | 2.00E-04 | 52.4 |
| 80  | 284 | 59  | 268 | 2.00E-04 | 52   |
| 72  | 279 | 21  | 231 | 2.00E-04 | 51.2 |
| 46  | 270 | 11  | 248 | 2.00E-04 | 51.6 |
| 96  | 270 | 381 | 542 | 2.00E-04 | 52   |
| 1   | 94  | 1   | 113 | 2.00E-04 | 51.6 |
| 76  | 274 | 51  | 232 | 2.00E-04 | 50.8 |
| 62  | 279 | 18  | 239 | 2.00E-04 | 50.8 |
| 1   | 94  | 1   | 113 | 2.00E-04 | 51.6 |
| 1   | 94  | 1   | 113 | 2.00E-04 | 51.2 |
| 51  | 278 | 9   | 235 | 2.00E-04 | 50.8 |
| 96  | 269 | 22  | 184 | 3.00E-04 | 50.4 |
| 72  | 279 | 21  | 231 | 3.00E-04 | 50.4 |
| 1   | 82  | 1   | 97  | 3.00E-04 | 51.2 |
| 145 | 284 | 117 | 245 | 3.00E-04 | 50.4 |
| 85  | 283 | 631 | 823 | 3.00E-04 | 51.6 |
| 85  | 270 | 173 | 363 | 3.00E-04 | 51.2 |
| 145 | 284 | 117 | 245 | 3.00E-04 | 50.4 |
| 85  | 270 | 639 | 815 | 3.00E-04 | 51.6 |
| 85  | 278 | 639 | 823 | 3.00E-04 | 51.6 |
| 96  | 270 | 663 | 826 | 4.00E-04 | 51.2 |
| 94  | 269 | 29  | 192 | 4.00E-04 | 49.7 |
| 89  | 278 | 89  | 264 | 4.00E-04 | 50.4 |
| 51  | 278 | 9   | 235 | 5.00E-04 | 50.1 |
| 52  | 278 | 10  | 235 | 5.00E-04 | 49.7 |
| 94  | 278 | 25  | 197 | 6.00E-04 | 49.3 |
| 77  | 270 | 44  | 237 | 6.00E-04 | 49.7 |
| 16  | 278 | 126 | 378 | 7.00E-04 | 50.1 |
| 47  | 278 | 5   | 235 | 7.00E-04 | 49.3 |
| 47  | 278 | 5   | 235 | 7.00E-04 | 49.3 |
| 39  | 278 | 11  | 248 | 7.00E-04 | 49.3 |
| 96  | 270 | 642 | 805 | 7.00E-04 | 50.4 |
| 72  | 279 | 21  | 231 | 9.00E-04 | 48.9 |
| 200 | 267 | 185 | 249 | 9.00E-04 | 49.3 |
| 94  | 278 | 18  | 188 | 9.00E-04 | 48.5 |

|     |     |     |     |       |      |
|-----|-----|-----|-----|-------|------|
| 88  | 271 | 48  | 231 | 0.001 | 49.3 |
| 99  | 270 | 86  | 261 | 0.001 | 49.7 |
| 47  | 278 | 5   | 235 | 0.001 | 48.9 |
| 2   | 80  | 6   | 86  | 0.001 | 49.7 |
| 99  | 269 | 25  | 184 | 0.001 | 48.5 |
| 47  | 278 | 5   | 235 | 0.001 | 48.9 |
| 85  | 270 | 639 | 815 | 0.001 | 49.7 |
| 51  | 278 | 9   | 235 | 0.001 | 48.9 |
| 84  | 269 | 628 | 801 | 0.001 | 49.7 |
| 55  | 278 | 3   | 225 | 0.001 | 48.5 |
| 5   | 82  | 6   | 85  | 0.001 | 49.3 |
| 93  | 269 | 19  | 184 | 0.001 | 48.1 |
| 87  | 270 | 631 | 805 | 0.002 | 49.3 |
| 94  | 278 | 18  | 188 | 0.002 | 47.8 |
| 85  | 278 | 53  | 246 | 0.002 | 48.5 |
| 52  | 278 | 10  | 235 | 0.002 | 48.1 |
| 52  | 278 | 10  | 235 | 0.002 | 48.1 |
| 52  | 278 | 10  | 235 | 0.002 | 48.1 |
| 52  | 278 | 10  | 235 | 0.002 | 48.1 |
| 122 | 266 | 10  | 152 | 0.002 | 46.6 |
| 52  | 278 | 10  | 235 | 0.002 | 48.1 |
| 72  | 279 | 21  | 231 | 0.002 | 47.8 |
| 104 | 278 | 27  | 188 | 0.002 | 47.4 |
| 34  | 267 | 2   | 247 | 0.002 | 48.5 |
| 52  | 278 | 10  | 235 | 0.002 | 48.1 |
| 1   | 128 | 1   | 137 | 0.002 | 48.1 |
| 52  | 278 | 10  | 235 | 0.002 | 48.1 |
| 47  | 270 | 13  | 242 | 0.002 | 48.1 |
| 94  | 269 | 19  | 182 | 0.002 | 47.4 |
| 4   | 108 | 6   | 120 | 0.002 | 48.1 |
| 132 | 274 | 112 | 232 | 0.002 | 47.8 |
| 94  | 278 | 25  | 197 | 0.002 | 47.4 |
| 145 | 270 | 117 | 236 | 0.003 | 47.8 |
| 95  | 273 | 126 | 307 | 0.003 | 47.8 |
| 85  | 278 | 139 | 343 | 0.003 | 48.1 |
| 95  | 273 | 126 | 307 | 0.003 | 47.8 |
| 175 | 278 | 714 | 809 | 0.003 | 48.5 |
| 52  | 274 | 10  | 231 | 0.003 | 47.4 |
| 84  | 280 | 189 | 376 | 0.003 | 47.8 |
| 47  | 269 | 25  | 250 | 0.003 | 47.8 |
| 52  | 278 | 10  | 235 | 0.003 | 47.4 |

|     |     |     |     |       |      |
|-----|-----|-----|-----|-------|------|
| 84  | 278 | 22  | 202 | 0.003 | 47   |
| 55  | 278 | 3   | 225 | 0.003 | 47.4 |
| 52  | 278 | 10  | 235 | 0.003 | 47.4 |
| 51  | 278 | 9   | 235 | 0.004 | 47.4 |
| 55  | 278 | 3   | 225 | 0.004 | 47   |
| 55  | 278 | 3   | 225 | 0.004 | 47   |
| 161 | 270 | 10  | 111 | 0.004 | 45.4 |
| 175 | 278 | 717 | 812 | 0.004 | 48.1 |
| 51  | 278 | 9   | 235 | 0.004 | 47   |
| 12  | 82  | 13  | 85  | 0.004 | 47.8 |
| 91  | 270 | 72  | 246 | 0.005 | 47   |
| 51  | 278 | 9   | 235 | 0.005 | 47   |
| 51  | 278 | 9   | 235 | 0.005 | 47   |
| 143 | 270 | 93  | 214 | 0.005 | 46.6 |
| 51  | 278 | 9   | 235 | 0.005 | 47   |
| 14  | 157 | 13  | 142 | 0.005 | 47.4 |
| 51  | 278 | 9   | 235 | 0.005 | 47   |
| 99  | 267 | 70  | 242 | 0.005 | 47   |
| 76  | 274 | 51  | 232 | 0.005 | 46.6 |
| 157 | 278 | 142 | 265 | 0.006 | 47   |
| 47  | 278 | 5   | 235 | 0.006 | 46.6 |
| 73  | 270 | 24  | 206 | 0.006 | 46.2 |
| 73  | 270 | 48  | 230 | 0.006 | 46.6 |
| 9   | 78  | 4   | 73  | 0.006 | 46.6 |
| 200 | 267 | 185 | 249 | 0.007 | 46.6 |
| 36  | 277 | 2   | 251 | 0.007 | 47   |
| 52  | 278 | 10  | 235 | 0.008 | 46.2 |
| 1   | 76  | 1   | 82  | 0.008 | 46.6 |
| 1   | 86  | 1   | 87  | 0.008 | 46.6 |
| 51  | 278 | 9   | 235 | 0.008 | 46.2 |
| 94  | 278 | 39  | 213 | 0.009 | 45.8 |
| 9   | 98  | 4   | 94  | 0.009 | 46.2 |
| 94  | 278 | 191 | 376 | 0.009 | 46.6 |
| 47  | 278 | 5   | 235 | 0.009 | 46.2 |
| 175 | 278 | 544 | 639 | 0.01  | 46.6 |
| 25  | 82  | 41  | 97  | 0.01  | 46.6 |
| 25  | 82  | 41  | 97  | 0.01  | 46.6 |
| 96  | 278 | 28  | 213 | 0.011 | 45.8 |
| 95  | 273 | 126 | 307 | 0.011 | 46.2 |
| 87  | 270 | 631 | 805 | 0.011 | 46.6 |
| 87  | 270 | 631 | 805 | 0.011 | 46.6 |

|     |     |     |     |       |      |
|-----|-----|-----|-----|-------|------|
| 25  | 82  | 41  | 97  | 0.012 | 46.2 |
| 55  | 278 | 3   | 225 | 0.012 | 45.4 |
| 55  | 278 | 3   | 225 | 0.012 | 45.4 |
| 29  | 101 | 15  | 87  | 0.013 | 45.1 |
| 176 | 269 | 96  | 190 | 2.3   | 38.5 |
| 94  | 278 | 20  | 188 | 0.013 | 45.1 |
| 96  | 278 | 50  | 235 | 0.015 | 45.4 |
| 85  | 270 | 55  | 236 | 0.015 | 46.2 |
| 55  | 278 | 3   | 225 | 0.015 | 45.4 |
| 9   | 77  | 4   | 72  | 0.016 | 45.4 |
| 148 | 270 | 75  | 187 | 0.016 | 45.8 |
| 55  | 278 | 3   | 225 | 0.016 | 45.4 |
| 95  | 273 | 126 | 307 | 0.016 | 45.4 |
| 9   | 78  | 4   | 73  | 0.016 | 45.4 |
| 96  | 278 | 50  | 235 | 0.016 | 45.4 |
| 96  | 278 | 40  | 225 | 0.016 | 45.4 |
| 1   | 74  | 1   | 79  | 0.017 | 45.8 |
| 5   | 81  | 1   | 79  | 0.017 | 45.4 |
| 47  | 278 | 5   | 235 | 0.017 | 45.1 |
| 47  | 278 | 5   | 235 | 0.018 | 45.1 |
| 51  | 278 | 9   | 235 | 0.019 | 45.1 |
| 223 | 278 | 5   | 59  | 0.019 | 42.7 |
| 96  | 270 | 406 | 566 | 0.019 | 45.8 |
| 96  | 269 | 24  | 191 | 0.019 | 44.7 |
| 84  | 277 | 51  | 245 | 0.02  | 45.1 |
| 88  | 270 | 48  | 230 | 0.021 | 45.1 |
| 143 | 269 | 112 | 232 | 0.022 | 45.1 |
| 18  | 82  | 30  | 99  | 0.022 | 45.4 |
| 18  | 82  | 30  | 99  | 0.023 | 45.4 |
| 18  | 82  | 30  | 99  | 0.023 | 45.4 |
| 85  | 278 | 11  | 190 | 0.024 | 44.3 |
| 96  | 278 | 66  | 252 | 0.025 | 44.7 |
| 101 | 278 | 110 | 267 | 0.026 | 44.7 |
| 51  | 278 | 9   | 235 | 0.026 | 44.7 |
| 51  | 278 | 9   | 235 | 0.027 | 44.7 |
| 51  | 278 | 9   | 235 | 0.028 | 44.7 |
| 47  | 278 | 5   | 235 | 0.028 | 44.7 |
| 47  | 278 | 5   | 235 | 0.029 | 44.7 |
| 175 | 278 | 553 | 648 | 0.033 | 45.1 |
| 47  | 278 | 5   | 235 | 0.034 | 44.3 |
| 94  | 278 | 39  | 213 | 0.035 | 44.3 |



|     |     |     |     |       |      |
|-----|-----|-----|-----|-------|------|
| 47  | 278 | 5   | 235 | 0.038 | 44.3 |
| 12  | 81  | 12  | 81  | 0.039 | 44.7 |
| 52  | 278 | 10  | 235 | 0.039 | 44.3 |
| 85  | 274 | 175 | 360 | 0.041 | 44.7 |
| 47  | 278 | 5   | 235 | 0.042 | 43.9 |
| 93  | 270 | 60  | 241 | 0.043 | 44.7 |
| 154 | 270 | 343 | 455 | 0.2   | 42.4 |
| 47  | 278 | 5   | 235 | 0.047 | 43.9 |
| 94  | 278 | 20  | 193 | 0.047 | 43.5 |
| 119 | 278 | 3   | 154 | 0.048 | 43.1 |
| 47  | 278 | 5   | 235 | 0.05  | 43.9 |
| 47  | 278 | 5   | 235 | 0.05  | 43.9 |
| 1   | 76  | 1   | 82  | 0.051 | 44.3 |
| 96  | 269 | 2   | 164 | 0.052 | 43.1 |
| 96  | 278 | 38  | 210 | 0.052 | 43.5 |
| 157 | 281 | 169 | 287 | 0.053 | 43.9 |
| 96  | 278 | 40  | 225 | 0.053 | 43.5 |
| 154 | 278 | 479 | 598 | 0.053 | 44.3 |
| 1   | 76  | 1   | 82  | 0.055 | 43.9 |
| 47  | 278 | 5   | 235 | 0.055 | 43.5 |
| 55  | 278 | 3   | 225 | 0.055 | 43.5 |
| 91  | 270 | 68  | 242 | 0.056 | 43.9 |
| 80  | 278 | 7   | 193 | 0.06  | 43.1 |
| 51  | 278 | 9   | 235 | 0.064 | 43.5 |
| 127 | 270 | 83  | 211 | 0.064 | 43.1 |
| 47  | 278 | 5   | 235 | 0.065 | 43.5 |
| 96  | 278 | 40  | 225 | 0.073 | 43.1 |
| 1   | 76  | 1   | 82  | 0.075 | 43.5 |
| 96  | 278 | 40  | 225 | 0.076 | 43.1 |
| 52  | 278 | 10  | 235 | 0.077 | 43.1 |
| 52  | 278 | 10  | 235 | 0.08  | 43.1 |
| 52  | 278 | 6   | 229 | 0.082 | 43.1 |
| 47  | 278 | 5   | 235 | 0.086 | 43.1 |
| 47  | 278 | 5   | 235 | 0.088 | 43.1 |
| 2   | 92  | 10  | 109 | 0.089 | 43.5 |
| 51  | 278 | 9   | 235 | 0.092 | 43.1 |
| 143 | 269 | 112 | 232 | 0.094 | 43.1 |
| 177 | 270 | 121 | 211 | 0.1   | 42.7 |
| 1   | 74  | 1   | 78  | 0.11  | 43.1 |
| 175 | 270 | 475 | 562 | 0.11  | 43.5 |
| 92  | 283 | 49  | 243 | 0.11  | 43.1 |

|     |     |      |      |      |      |
|-----|-----|------|------|------|------|
| 52  | 278 | 10   | 235  | 0.11 | 42.7 |
| 3   | 228 | 4814 | 5037 | 0.12 | 43.5 |
| 47  | 278 | 5    | 235  | 0.12 | 42.7 |
| 96  | 278 | 40   | 225  | 0.12 | 42.7 |
| 127 | 270 | 94   | 222  | 0.12 | 42.4 |
| 55  | 278 | 3    | 225  | 0.13 | 42.4 |
| 8   | 97  | 4    | 109  | 0.13 | 42.7 |
| 85  | 274 | 72   | 263  | 0.14 | 42.4 |
| 96  | 278 | 470  | 642  | 0.14 | 43.1 |
| 164 | 270 | 19   | 115  | 0.15 | 40.8 |
| 88  | 270 | 31   | 203  | 0.15 | 42.4 |
| 99  | 269 | 48   | 207  | 0.15 | 42.4 |
| 89  | 281 | 99   | 289  | 0.15 | 42.7 |
| 49  | 283 | 14   | 243  | 0.15 | 42.7 |
| 47  | 278 | 5    | 235  | 0.16 | 42.4 |
| 96  | 278 | 40   | 225  | 0.17 | 42   |
| 45  | 273 | 9    | 221  | 0.17 | 42   |
| 9   | 94  | 4    | 89   | 0.18 | 42.4 |
| 47  | 278 | 5    | 235  | 0.18 | 42   |
| 47  | 278 | 5    | 235  | 0.18 | 42   |
| 89  | 281 | 99   | 289  | 0.2  | 42.4 |
| 166 | 270 | 195  | 308  | 0.21 | 42   |
| 47  | 278 | 5    | 235  | 0.21 | 42   |
| 154 | 278 | 135  | 254  | 0.22 | 42   |
| 177 | 272 | 121  | 213  | 0.23 | 41.6 |
| 96  | 278 | 182  | 339  | 0.24 | 42   |
| 96  | 278 | 50   | 235  | 0.24 | 41.6 |
| 175 | 278 | 547  | 642  | 0.25 | 42.4 |
| 47  | 278 | 5    | 235  | 0.25 | 41.6 |
| 83  | 283 | 69   | 256  | 0.27 | 42   |
| 145 | 278 | 86   | 213  | 0.27 | 41.6 |
| 159 | 279 | 153  | 262  | 0.27 | 41.6 |
| 47  | 278 | 5    | 235  | 0.28 | 41.6 |
| 47  | 278 | 5    | 235  | 0.3  | 41.6 |
| 47  | 278 | 5    | 235  | 0.3  | 41.6 |
| 96  | 278 | 13   | 185  | 0.33 | 40.8 |
| 96  | 278 | 40   | 225  | 0.33 | 41.2 |
| 87  | 283 | 53   | 252  | 0.35 | 41.6 |
| 175 | 278 | 548  | 643  | 0.4  | 41.6 |
| 229 | 278 | 539  | 587  | 0.4  | 41.6 |
| 9   | 94  | 4    | 89   | 0.44 | 41.2 |

|     |     |     |     |      |      |
|-----|-----|-----|-----|------|------|
| 62  | 269 | 149 | 350 | 0.47 | 41.2 |
| 47  | 278 | 5   | 235 | 0.47 | 40.8 |
| 96  | 273 | 42  | 215 | 0.49 | 40.4 |
| 32  | 278 | 3   | 263 | 0.49 | 40.8 |
| 90  | 278 | 48  | 224 | 0.53 | 40.4 |
| 143 | 278 | 116 | 241 | 0.55 | 40.4 |
| 96  | 278 | 40  | 225 | 0.57 | 40.4 |
| 96  | 278 | 57  | 229 | 0.63 | 40.4 |
| 96  | 278 | 40  | 225 | 0.66 | 40.4 |
| 96  | 278 | 40  | 225 | 0.67 | 40.4 |
| 99  | 270 | 187 | 349 | 0.69 | 40.8 |
| 96  | 278 | 40  | 225 | 0.72 | 40   |
| 106 | 281 | 70  | 231 | 0.74 | 40.8 |
| 39  | 267 | 19  | 247 | 0.76 | 40.4 |
| 96  | 278 | 57  | 229 | 0.85 | 40   |
| 167 | 278 | 140 | 250 | 0.87 | 40   |
| 1   | 82  | 2   | 87  | 0.87 | 40.4 |
| 200 | 281 | 215 | 296 | 0.9  | 40   |
| 93  | 278 | 54  | 229 | 0.93 | 40   |
| 177 | 278 | 20  | 113 | 0.94 | 38.5 |
| 5   | 106 | 1   | 93  | 1.1  | 40   |
| 93  | 278 | 54  | 229 | 1.1  | 39.7 |
| 177 | 278 | 20  | 113 | 1.1  | 38.1 |
| 4   | 82  | 55  | 136 | 1.1  | 40   |
| 45  | 273 | 9   | 221 | 1.1  | 39.7 |
| 177 | 272 | 121 | 213 | 1.2  | 39.3 |
| 5   | 82  | 9   | 91  | 1.2  | 40   |
| 136 | 270 | 11  | 143 | 1.2  | 40   |
| 45  | 273 | 10  | 222 | 1.3  | 39.3 |
| 83  | 279 | 34  | 245 | 1.4  | 39.3 |
| 83  | 278 | 43  | 229 | 1.4  | 39.3 |
| 96  | 278 | 50  | 235 | 1.5  | 39.3 |
| 47  | 269 | 25  | 250 | 1.5  | 39.7 |
| 9   | 73  | 10  | 75  | 1.5  | 39.7 |
| 86  | 278 | 27  | 222 | 1.5  | 39.3 |
| 145 | 280 | 21  | 144 | 1.5  | 38.5 |
| 96  | 278 | 40  | 225 | 1.5  | 39.3 |
| 96  | 278 | 39  | 211 | 1.5  | 39.3 |
| 96  | 278 | 57  | 229 | 1.6  | 39.3 |
| 177 | 270 | 122 | 212 | 1.6  | 38.9 |
| 96  | 278 | 17  | 202 | 1.7  | 38.9 |

|     |     |     |     |     |      |
|-----|-----|-----|-----|-----|------|
| 96  | 278 | 50  | 235 | 1.7 | 39.3 |
| 96  | 278 | 50  | 235 | 1.7 | 38.9 |
| 177 | 278 | 20  | 113 | 1.8 | 37.7 |
| 83  | 278 | 43  | 229 | 1.8 | 38.9 |
| 47  | 269 | 25  | 250 | 1.8 | 39.3 |
| 164 | 268 | 256 | 350 | 1.9 | 39.3 |
| 95  | 273 | 48  | 222 | 1.9 | 38.9 |
| 47  | 278 | 5   | 235 | 2   | 38.9 |
| 47  | 269 | 25  | 250 | 2   | 39.3 |
| 1   | 80  | 11  | 93  | 2.1 | 39.3 |
| 96  | 269 | 22  | 185 | 2.2 | 38.5 |
| 9   | 82  | 6   | 85  | 2.4 | 38.9 |
| 96  | 278 | 57  | 229 | 2.4 | 38.5 |
| 47  | 274 | 12  | 230 | 2.4 | 38.5 |
| 94  | 278 | 25  | 196 | 2.4 | 38.5 |
| 83  | 278 | 4   | 190 | 2.5 | 38.5 |
| 177 | 270 | 122 | 212 | 2.5 | 38.5 |
| 45  | 273 | 9   | 221 | 2.5 | 38.5 |
| 40  | 273 | 1   | 223 | 2.5 | 38.5 |
| 94  | 274 | 41  | 207 | 2.6 | 38.5 |
| 6   | 78  | 3   | 75  | 2.7 | 38.5 |
| 36  | 106 | 7   | 89  | 3   | 38.9 |
| 1   | 80  | 11  | 93  | 3   | 38.9 |
| 177 | 270 | 121 | 211 | 3   | 38.1 |
| 164 | 269 | 186 | 286 | 3   | 38.5 |
| 209 | 278 | 522 | 586 | 3   | 38.9 |
| 177 | 270 | 122 | 212 | 3.1 | 38.1 |
| 80  | 278 | 14  | 223 | 3.1 | 38.1 |
| 47  | 273 | 7   | 222 | 3.1 | 38.1 |
| 177 | 270 | 121 | 211 | 3.2 | 38.1 |
| 177 | 270 | 121 | 211 | 3.3 | 38.1 |
| 209 | 278 | 522 | 586 | 3.3 | 38.9 |
| 93  | 268 | 179 | 350 | 3.3 | 38.5 |
| 31  | 82  | 40  | 89  | 3.4 | 38.5 |
| 113 | 263 | 41  | 184 | 3.6 | 38.5 |
| 47  | 273 | 7   | 222 | 3.6 | 38.1 |
| 47  | 273 | 7   | 222 | 3.6 | 38.1 |
| 93  | 272 | 179 | 355 | 3.8 | 38.5 |
| 144 | 270 | 86  | 211 | 3.9 | 37.7 |
| 93  | 279 | 85  | 284 | 3.9 | 38.1 |
| 83  | 278 | 43  | 229 | 3.9 | 38.1 |

|     |     |     |     |     |      |
|-----|-----|-----|-----|-----|------|
| 224 | 268 | 307 | 350 | 4.1 | 38.1 |
| 45  | 273 | 9   | 221 | 4.3 | 37.7 |
| 224 | 268 | 307 | 350 | 4.3 | 38.1 |
| 224 | 268 | 307 | 350 | 4.4 | 38.1 |
| 15  | 98  | 12  | 98  | 4.4 | 38.1 |
| 47  | 273 | 7   | 222 | 4.5 | 37.7 |
| 45  | 273 | 9   | 222 | 4.5 | 37.7 |
| 177 | 278 | 20  | 113 | 4.6 | 36.6 |
| 186 | 270 | 130 | 211 | 4.7 | 37.7 |
| 41  | 273 | 3   | 221 | 5   | 37.7 |
| 111 | 270 | 90  | 244 | 5   | 38.1 |
| 80  | 278 | 14  | 223 | 5.1 | 37.7 |
| 80  | 278 | 14  | 223 | 5.2 | 37.7 |
| 96  | 269 | 22  | 185 | 5.4 | 37.4 |
| 9   | 82  | 6   | 85  | 5.5 | 37.7 |
| 164 | 278 | 164 | 281 | 5.5 | 37.7 |
| 80  | 278 | 14  | 223 | 5.6 | 37.4 |
| 198 | 270 | 143 | 211 | 5.9 | 37.4 |
| 93  | 278 | 10  | 185 | 6   | 37   |
| 80  | 284 | 14  | 229 | 6.3 | 37.4 |
| 47  | 273 | 7   | 222 | 6.4 | 37.4 |
| 91  | 245 | 50  | 192 | 6.6 | 37.4 |
| 47  | 273 | 7   | 222 | 6.6 | 37.4 |
| 91  | 250 | 126 | 273 | 6.8 | 37.4 |
| 201 | 270 | 145 | 210 | 7.3 | 37   |
| 89  | 273 | 33  | 211 | 7.3 | 37   |
| 220 | 278 | 512 | 586 | 7.4 | 37.7 |
| 199 | 274 | 16  | 85  | 7.4 | 35.4 |
| 240 | 269 | 179 | 208 | 7.4 | 37.7 |
| 119 | 269 | 55  | 205 | 7.5 | 37   |
| 47  | 273 | 7   | 222 | 7.5 | 37   |
| 177 | 270 | 121 | 211 | 7.9 | 37   |
| 207 | 272 | 278 | 354 | 8.1 | 37.4 |
| 9   | 96  | 5   | 94  | 8.3 | 37   |
| 198 | 270 | 143 | 211 | 8.3 | 37   |
| 80  | 278 | 14  | 223 | 8.6 | 37   |
| 186 | 270 | 130 | 211 | 8.7 | 37   |
| 133 | 270 | 91  | 220 | 8.9 | 37.4 |
| 34  | 80  | 66  | 111 | 9   | 37.4 |
| 101 | 221 | 291 | 425 | 9.5 | 37.4 |
| 95  | 278 | 38  | 224 | 9.5 | 36.6 |

|     |     |    |     |     |      |
|-----|-----|----|-----|-----|------|
| 80  | 278 | 14 | 223 | 9.7 | 37   |
| 80  | 278 | 14 | 223 | 9.7 | 36.6 |
| 93  | 278 | 31 | 235 | 9.8 | 36.6 |
| 112 | 209 | 74 | 175 | 9.9 | 37.4 |
