# Supplementary material for: The Anti-sigma Factor RsiV Is a Bacterial Receptor for Lysozyme: Co-crystal Structure Determination and Demonstration That Binding of Lysozyme to RsiV Is Required for σV Activation
Source: PubMed Central journal article supplement (PMC5014341; doi:10.1371/journal.pgen.1006287), 2016-09-07
Supplement: pgen.1006287.s013.pdf [file pgen.1006287.s013.pdf]

**Table S2. Relative Expression in Response to Lysozyme exposure or IPTG Induction<sup>1</sup>**

| <b>Strain/Condition:</b> | <b>Fold Induction:</b> | <b>RsiV molecules/cell</b> | <b>Lysozyme molecules/cell</b> |
|--------------------------|------------------------|----------------------------|--------------------------------|
| PY79 Lysozyme 0          | 1                      | 220                        | 0                              |
| PY79 Lysozyme 1.25       | 99.41                  | 16695                      | 52640                          |
| PY79 IPTG                | 1                      | 220                        |                                |
| JLH 402 IPTG             | 44.11                  | 7419                       |                                |

<sup>1</sup>qRT experiment, standardized to *rpoB*.
