# Supplementary material for: The Anti-sigma Factor RsiV Is a Bacterial Receptor for Lysozyme: Co-crystal Structure Determination and Demonstration That Binding of Lysozyme to RsiV Is Required for σV Activation
Source: PubMed Central journal article supplement (PMC5014341; doi:10.1371/journal.pgen.1006287), 2016-09-07
Supplement: pgen.1006287.s014.pdf [file pgen.1006287.s014.pdf]

**Table S3 Oligonucleotides**

| <b>Primer</b> | <b>Sequence 5' to 3'</b>                                         | <b>Description of use</b>                |
|---------------|------------------------------------------------------------------|------------------------------------------|
| CDEP3092      | GCATCTTGGTACACACAAAGCCGTTATATTA<br>CAATTGACAAAAAGAATG            | Clone S169W                              |
| CDEP3093      | TTGTGTGTACCAAGATGCTTGTGTTGTTTCA<br>ATATTGCGCCG                   | Clone S169W                              |
| CDEP3108      | GCCGCAGGCTATATGGGCGTTACAGAGTTT<br>ACAATTCCAACCGGC                | Clone P259A                              |
| CDEP3109      | CCATATAGCCTGCGGGCGACTTCATATTCGT<br>CAAATGAGATCACAAGTTTATGGTC     | Clone P259A                              |
| CDEP3110      | GGCGCAATGGGCGTTACAGAGTTTACAATT<br>CCAACCGGCGTCATTTCAAAC          | Clone Y261A                              |
| CDEP3111      | TAACGCCCATTCGCGCCGGGGGCGACTTCAT<br>ATTCGTCAAATGAGATCAC           | Clone Y261A                              |
| CDEP3098      | GTTGCTGCAGGAGCTATGGGCGTTACAGAG<br>TTTACAATTCCAACCGGC             | Clone P259A, Y261A                       |
| CDEP3099      | CATAGCTCCTGCAGCAACTTCATATTCGTCA<br>AATGAGATCACAAGTTTATGGTCTTCAGT | Clone P259A, Y261A                       |
| CDEP3116      | AACAAAGCAGGGGCATCAGCATCTACAGTG<br>ATTACGAGACGGTCAC               | Clone K137A, H139A                       |
| CDEP3117      | GAGTGCCCTGCTTTGTTTTTGGATGTGGA<br>CTGTATAAACTCTTTATACAGCTGCTG     | Clone K137A, H139A                       |
| CDEP3163      | TAGAATTCGAGCTCCCGGGACAAGCAATGA<br>TATCACCG                       | Clone <i>oatA</i> onto pMAD              |
| CDEP3136      | TAGAATTCGAGCTCCCGGGACAAGCAATGA<br>TATCACCG                       | Adds 1 kb for P259A and<br>Y261A mutants |
| CDEP1107      | TGTCAAAGATCCCTGTCATCGGCA                                         | qRT PCR <i>rsiV</i>                      |
| CDEP1108      | TTAGAAAGCCCGGACAAAGCAGGT                                         | qRT PCR <i>rsiV</i>                      |
| CDEP1017      | CAAACCGTGGCGCATGGTTAGAAT                                         | qRT PCR <i>rpoB</i>                      |
| CDEP1018      | CGGCAACTTACGTGTGCGATCAAT                                         | qRT PCR <i>rpoB</i>                      |
